# Supplementary material for: Cyanopeptolins with Trypsin and Chymotrypsin Inhibitory Activity from the Cyanobacterium Nostoc edaphicum CCNP1411
Source: PubMed Central journal article supplement (PMC6070996; doi:10.3390/md16070220), 2018-06-26
Supplement: marinedrugs-16-00220-s001.pdf [file marinedrugs-16-00220-s001.pdf]

# Supplementary Material: Cyanopeptolins with trypsin and chymotrypsin inhibitory activity from the cyanobacterium *Nostoc edaphicum* CCNP1411

Hanna Mazur-Marzec<sup>1,2\*</sup>, Anna Fidor<sup>1</sup>, Marta Ceglowska<sup>2</sup>, Ewa Wiczerzak<sup>3</sup>, Magdalena Kropidłowska<sup>3</sup>, Marie Goua<sup>4</sup>, Jenny Macaskill<sup>4</sup>, Christine Edwards<sup>4</sup>

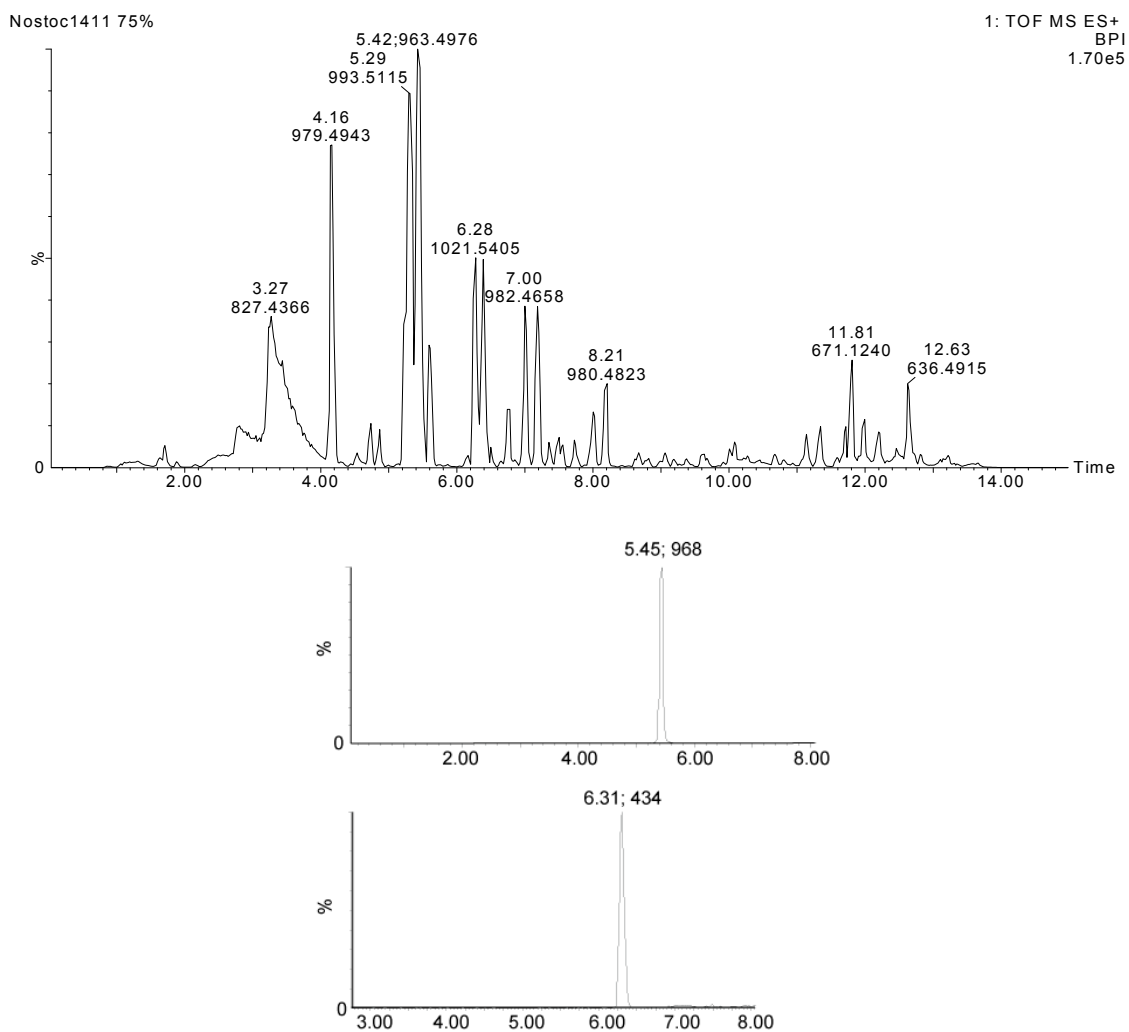

**Figure S1.** LC-MS/MS chromatogram of cyanopeptolins (CPs) in crude extract from *Nostoc edaphicum* CCNP1411 (A) and chromatograms of isolated peptides: CP962 (B) and CP985 (C).

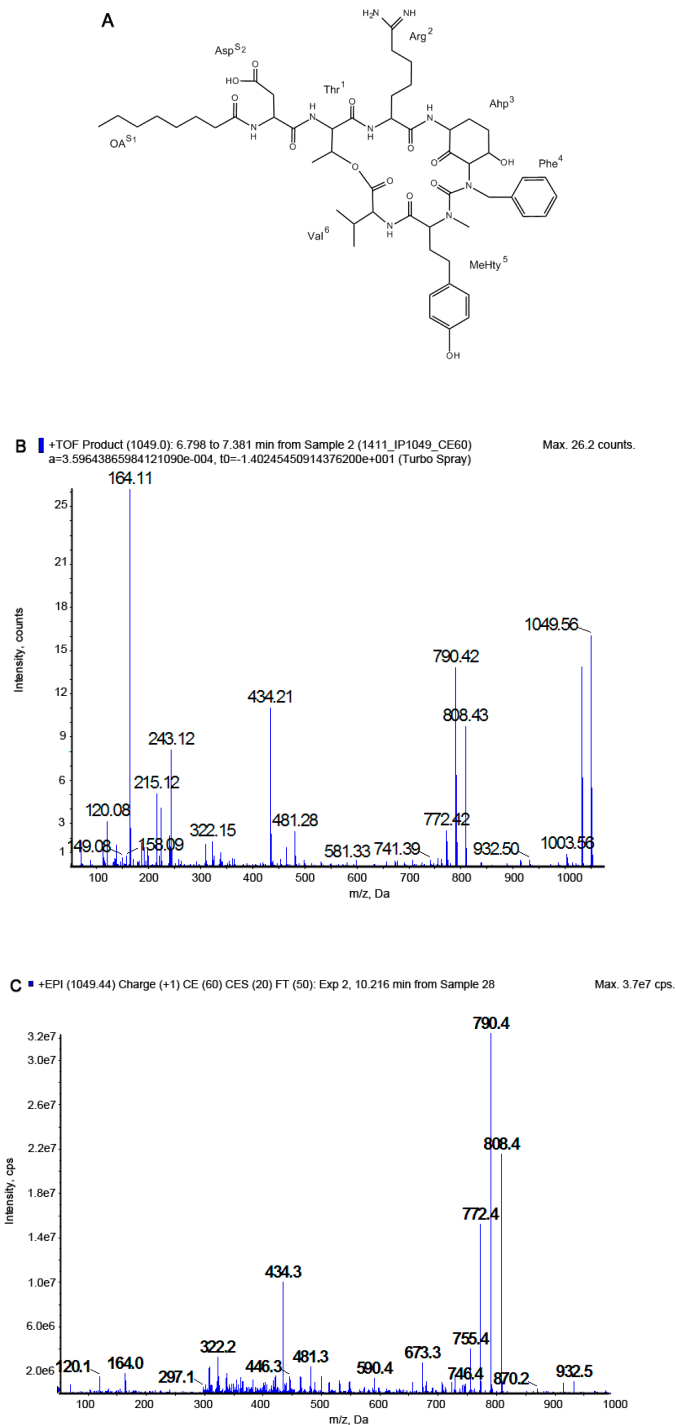

**Figure S2.** Chemical structure (A) and product ion mass spectra of cyanopeptolin CP1049 [Thr+Arg+Ahp+Phe+MeHty+Val]Asp+OA with precursor ion  $[M + H]^+$  at  $m/z$  1049. The spectra were recorded with application of a hybride quadrupole/time-of-flight mass spectrometer (QTOF) (B) and a hybride triple quadrupole/linear ion trap mass spectrometer (QTRAP) (C). The mass signals were assigned to the following fragments: 1031  $[M + H - H_2O]^+$ , 1003  $[M + H - H_2O - CO]^+$ , 932  $[M + H - Val - H_2O]^+$ , 914  $[M + H - Val - 2H_2O]^+$ , 808  $[M + 2H - (Asp + OA)]^+$ , 790  $[M + 2H - (Asp + OA) - H_2O]^+$ , 772  $[M + 2H - (Asp + OA) - 2H_2O]^+$ , 741  $[M + H - (Val + MeHty) - H_2O]^+$ , 673  $[M + 2H - Val - (Asp + OA) - 2H_2O]^+$ , 481  $[OA+Asp + Thr + Arg + H - H_2O]^+$ , 434  $[Ahp + Phe + MeHty + H - H_2O]^+$ , 338  $[Arg + Thr + Val + H - H_2O]^+$ , 322  $[Phe(-N) + MeHty + H]^+$ , 297  $[Asp + Thr + Val + H - H_2O]^+$ , 243  $[Ahp + Phe + H - H_2O]^+$ , 215  $[Ahp + Phe + H - H_2O - CO]^+$ , 164 MeHty immonium ion, 120 Phe immonium ion, 70-Arg.

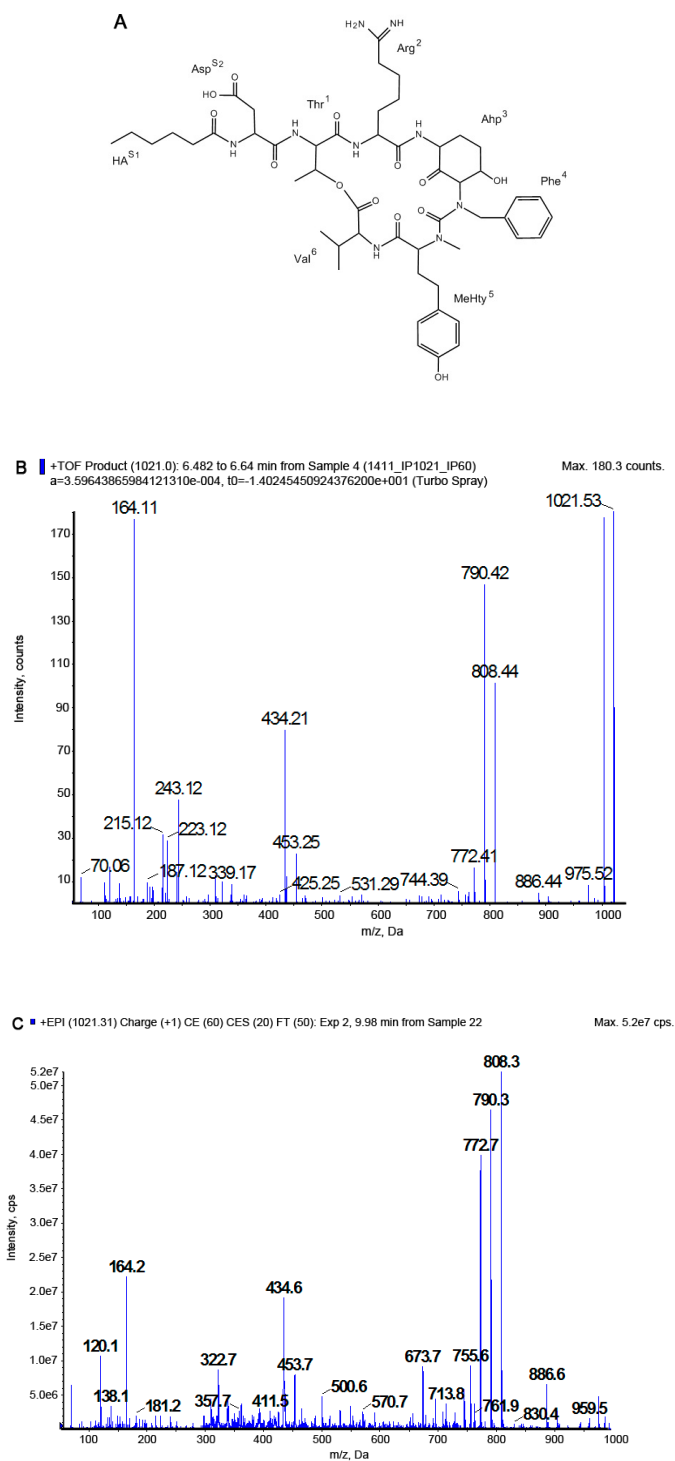

**Figure S3.** Chemical structure (A) and product ion mass spectra of cyanopeptolin CP1020 [Thr+Arg+Ahp+Phe+MeHty+Val]Asp+HA with precursor ion  $[M+H]^+$  at  $m/z$  1021. The spectra were recorded with application of QTOF (B) and QTRAP (C) mass spectrometers. The mass signals were assigned to the following fragments: 1003  $[M+H-H_2O]^+$ , 975  $[M+H-H_2O-CO]^+$ , 886  $[M+H-Val-2H_2O]^+$ , 808  $[M+2H-(Asp+HA)]^+$ , 790  $[M+2H-(Asp+HA)-H_2O]^+$ , 772  $[M+2H-(Asp+OA)-2H_2O]^+$ , 713  $[M+H-(Val+MeHty)-H_2O]^+$ , 691  $[M+2H-Val-(Asp+HA)-H_2O]^+$ , 673  $[M+2H-Val-(Asp+HA)-2H_2O]^+$ , 453  $[HA+Asp+Thr+Arg+H-H_2O]^+$ , 434  $[Ahp+Phe+MeHty+H-H_2O]^+$ , 338  $[Arg+Thr+Val+H-H_2O]^+$ , 322  $[Phe(-N)+MeHty+H]^+$ , 297  $[Asp+Thr+Val+H-H_2O]^+$ , 243  $[Ahp+Phe+H-H_2O]^+$ , 215  $[Ahp+Phe+H-H_2O-CO]^+$ , 164 MeHty immonium ion, 120 Phe immonium ion, 70-Arg.

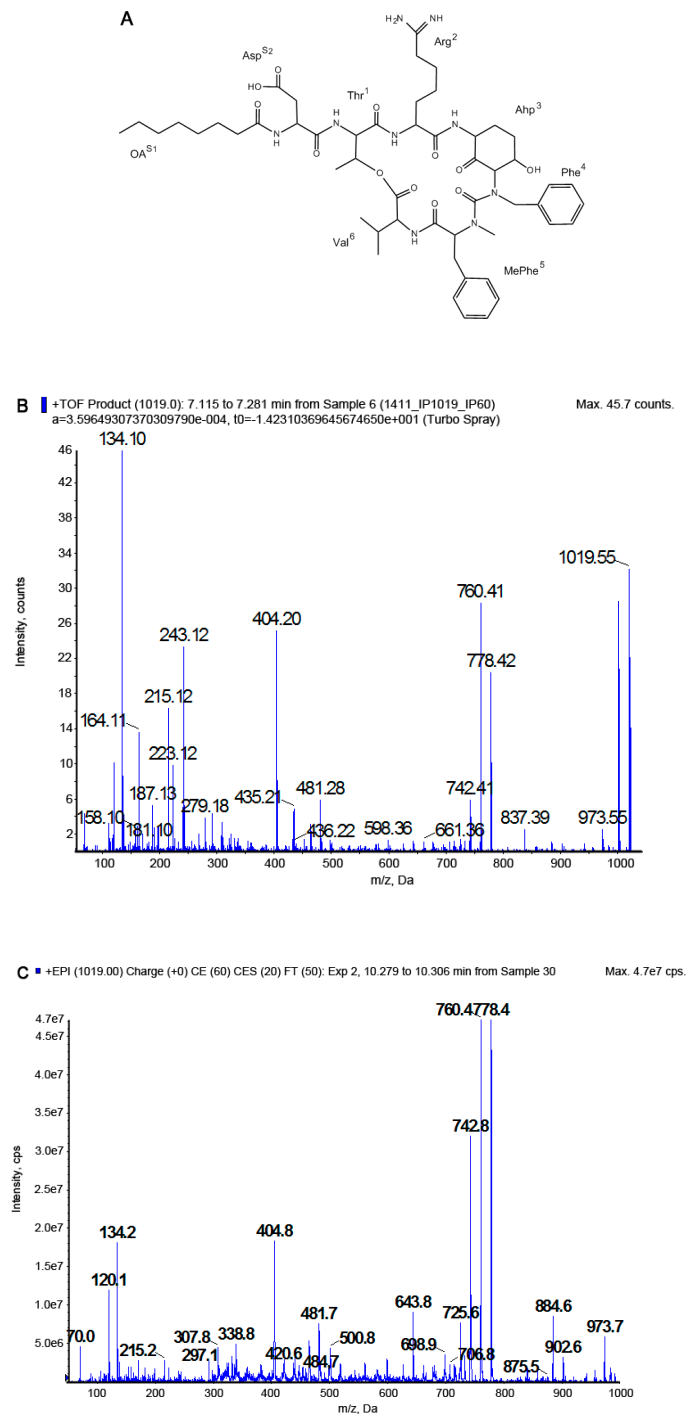

**Figure S4.** Chemical structure (A) and product ion mass spectra of cyanopeptolin CP1018 [Thr+Arg+Ahp+Phe+MePhe+Val]Asp+OA with precursor ion  $[M+H]^+$  at  $m/z$  1019. The spectra were recorded with application of QTOF (B) and QTRAP (C) mass spectrometers. The mass signals were assigned to the following fragments: 1001  $[M + H - H_2O]^+$ , 983  $[M + H - 2H_2O]^+$ , 973  $[M + H - H_2O - CO]^+$ , 902  $[M + H - Val - H_2O]^+$ , 884  $[M + H - Val - 2H_2O]^+$ , 778  $[M + 2H - (Asp + OA)]^+$ , 760  $[M + 2H - (Asp + OA) - H_2O]^+$ , 742  $[M + 2H - (Asp + OA) - 2H_2O]^+$ , 661  $[M + 2H - Val - (Asp+OA) - H_2O]^+$ , 643  $[M + 2H - Val - (Asp + OA) - 2H_2O]^+$ , 481  $[OA + Asp + Thr + Arg + H - H_2O]^+$ , 404  $[Ahp + Phe + MePhe + H - H_2O]^+$ , 338  $[Arg + Thr + Val + H - H_2O]^+$ , 308  $[Phe(-N) + MeTyr + H]^+$ , 297  $[Asp + Thr + Val + H - H_2O]^+$ , 243  $[Ahp + Phe + H - H_2O]^+$ , 215  $[Ahp + Phe + H - H_2O - CO]^+$ , 134 MePhe immonium ion, 120 Phe immonium ion, 70-Arg.

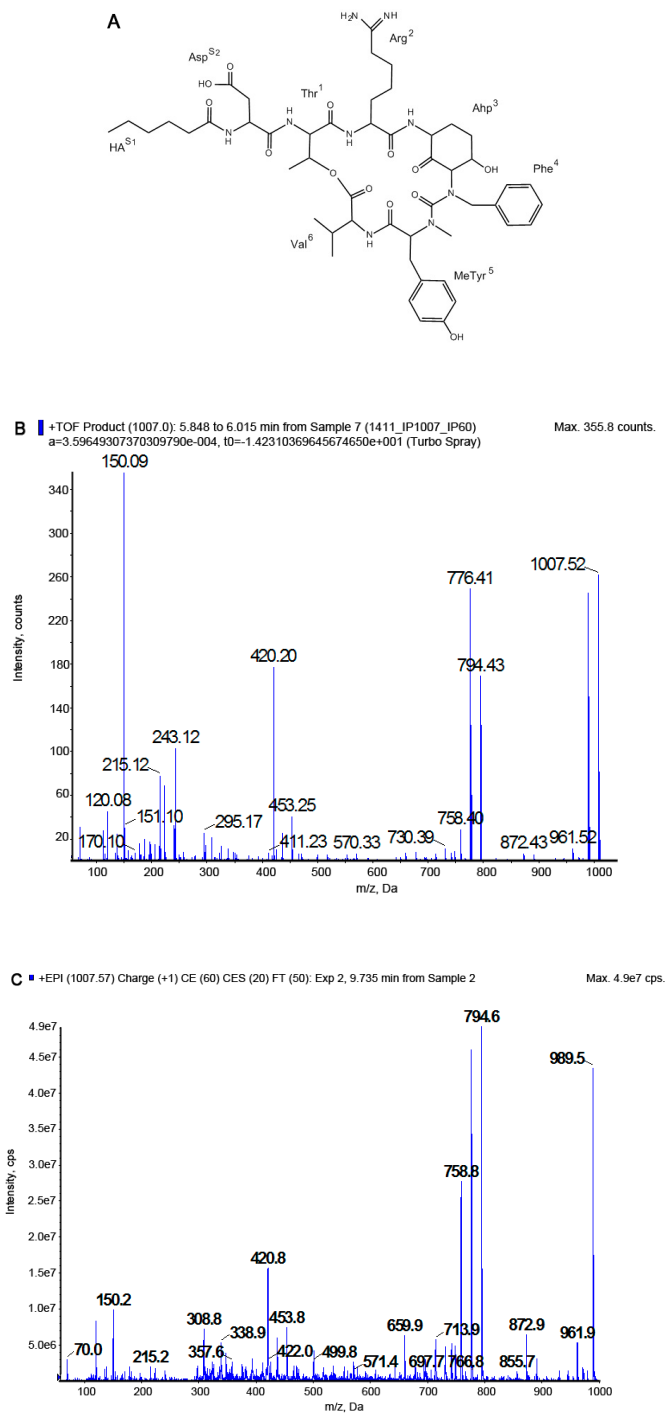

**Figure S5.** Chemical structure (A) and product ion mass spectra of cyanopeptolin CP1006 [Thr+Arg+Ahp+Phe+MeTyr+Val]Asp+HA with precursor ion  $[M + H]^+$  at  $m/z$  1007. The spectra were recorded with application of QTOF (B) and QTRAP (A) mass spectrometers. The mass signals were assigned to the following fragments: 989  $[M + H - H_2O]^+$ , 961  $[M + H - H_2O - CO]^+$ , 872  $[M + H - Val - 2H_2O]^+$ , 794  $[M + 2H - (Asp + HA)]^+$ , 776  $[M + 2H - (Asp + HA) - H_2O]^+$ , 766  $[M + 2H - (Asp + HA) - CO]^+$ , 758  $[M + 2H - (Asp + HA) - 2H_2O]^+$ , 713  $[M + H - (Val + MeHTyr) - H_2O]^+$ , 659  $[M + 2H - Val - (Asp + HA) - 2H_2O]^+$ , 453  $[HA + Asp + Thr + Arg + H - H_2O]^+$ , 420  $[Ahp + Phe + MeTyr + H - H_2O]^+$ , 338  $[Arg + Thr + Val + H - H_2O]^+$ , 308  $[Phe(-N) + MeTyr + H]^+$ , 297  $[Asp + Thr + Val + H - H_2O]^+$ , 243  $[Ahp + Phe + H - H_2O]^+$ , 215  $[Ahp + Phe + H - H_2O - CO]^+$ , 150 MeTyr immonium ion, 70-Arg.

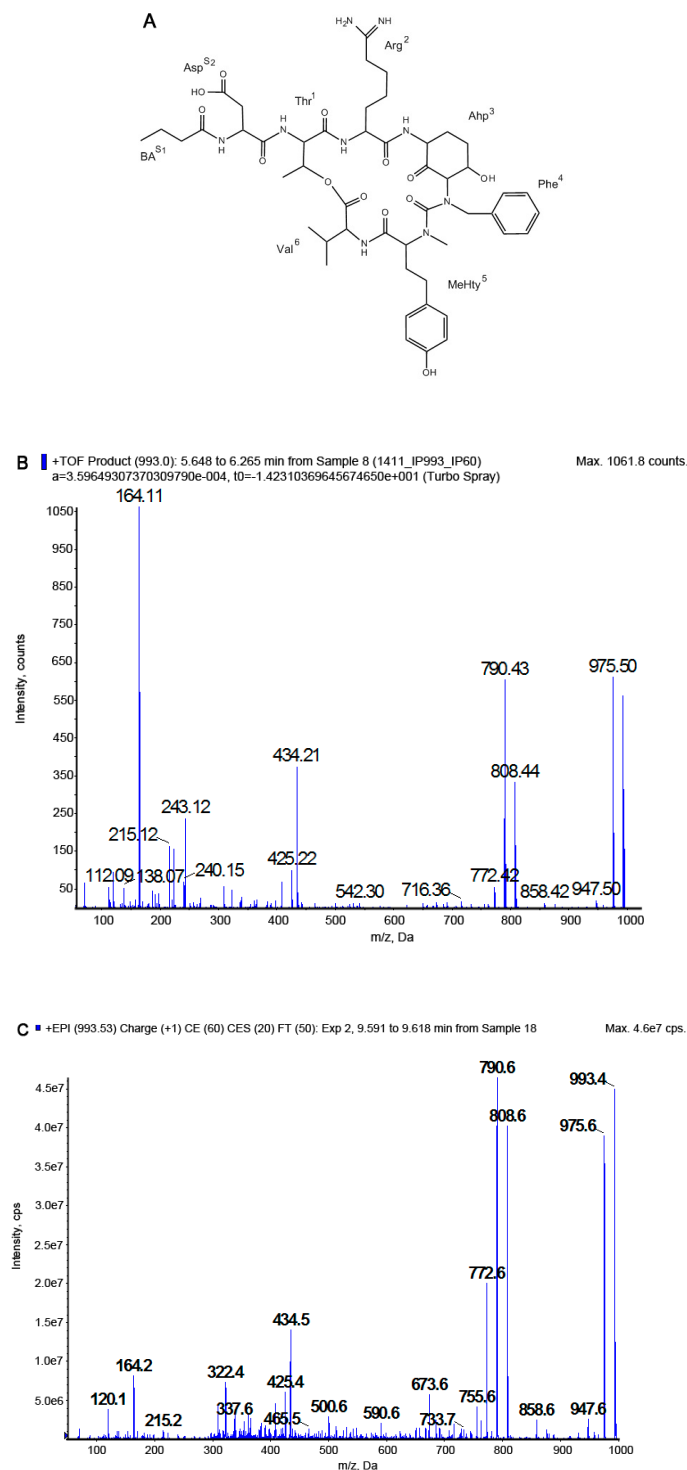

**Figure S6.** Chemical structure (A) and product ion mass spectra of cyanopeptolin CP992 [Thr+Arg+Ahp+Phe+MeHty+Val]Asp+BA with precursor ion  $[M + H]^+$  at  $m/z$  993. The spectra were recorded with application of QTOF (B) and QTRAP (C) mass spectrometers. The mass signals were assigned to the following fragments: 975  $[M + H - H_2O]^+$ , 947  $[M + H - H_2O - CO]^+$ , 858  $[M + H - Val - 2H_2O]^+$ , 808  $[M + 2H - (Asp + BA)]^+$ , 790  $[M + 2H - (Asp + BA) - H_2O]^+$ , 772  $[M + 2H - (Asp + BA) - 2H_2O]^+$ , 673  $[M + 2H - Val - (Asp + BA) - 2H_2O]^+$ , 434  $[Ahp + Phe + MeHty + H - H_2O]^+$ , 425  $[BA + Asp + Thr + Arg + H - H_2O]^+$ , 338  $[Arg + Thr + Val + H - H_2O]^+$ , 322  $[Phe(-N) + MeHty + H]^+$ , 243  $[Ahp + Ph + H - H_2O]^+$ , 215  $[Ahp + Phe + H - H_2O - CO]^+$ , 164 MeHty immonium ion, 120 Phe immonium ion, 70-Arg.

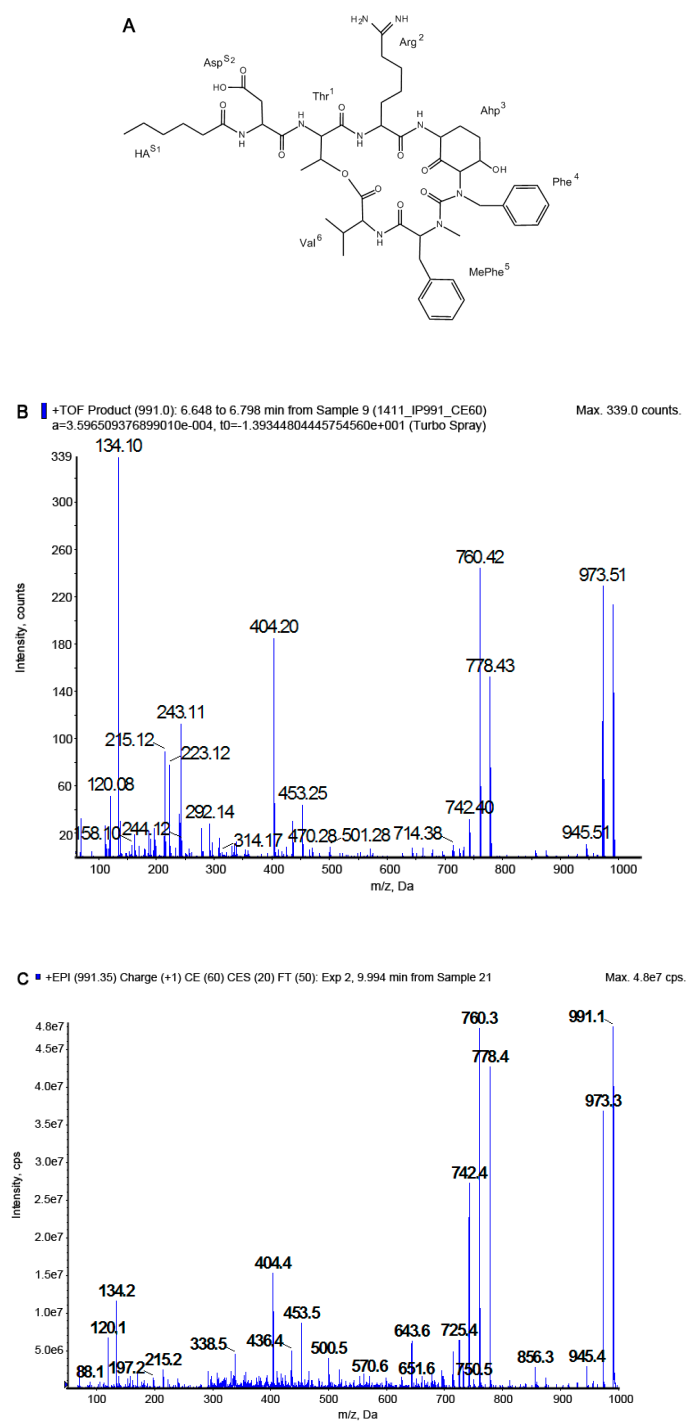

**Figure S7.** Chemical structure (A) and product ion mass spectra of cyanopeptolin CP990 [Thr+Arg+Ahp+Phe+MePhe+Val]Asp+HA with precursor ion  $[M + H]^+$  at  $m/z$  991. The spectra were recorded with application of QTOF (B) and QTRAP (C) mass spectrometers. The mass signals were assigned to the following fragments: 973  $[M + H - H_2O]^+$ , 945  $[M + H - H_2O - CO]^+$ , 856  $[M + H - Val - 2H_2O]^+$ , 778  $[M + 2H - (Asp + HA)]^+$ , 760  $[M + 2H - (Asp + HA) - H_2O]^+$ , 750  $[M + 2H - (Asp + HA) - CO]^+$ , 742  $[M + 2H - (Asp + HA) - 2H_2O]^+$ , 643  $[M + 2H - Val - (Asp + HA) - 2H_2O]^+$ , 453  $[HA + Asp + Thr + Arg + H - H_2O]^+$ , 404  $[Ahp + Phe + MePhe + H - H_2O]^+$ , 338  $[Arg + Thr + Val + H - H_2O]^+$ , 297  $[Asp + Thr + Val + H - H_2O]^+$ , 243  $[Ahp+Phe+H-H_2O]^+$ , 215  $[Ahp+Phe+H-H_2O-CO]^+$ , 134 MePhe immonium ion, 120 Phe immonium ion, 70-Arg.

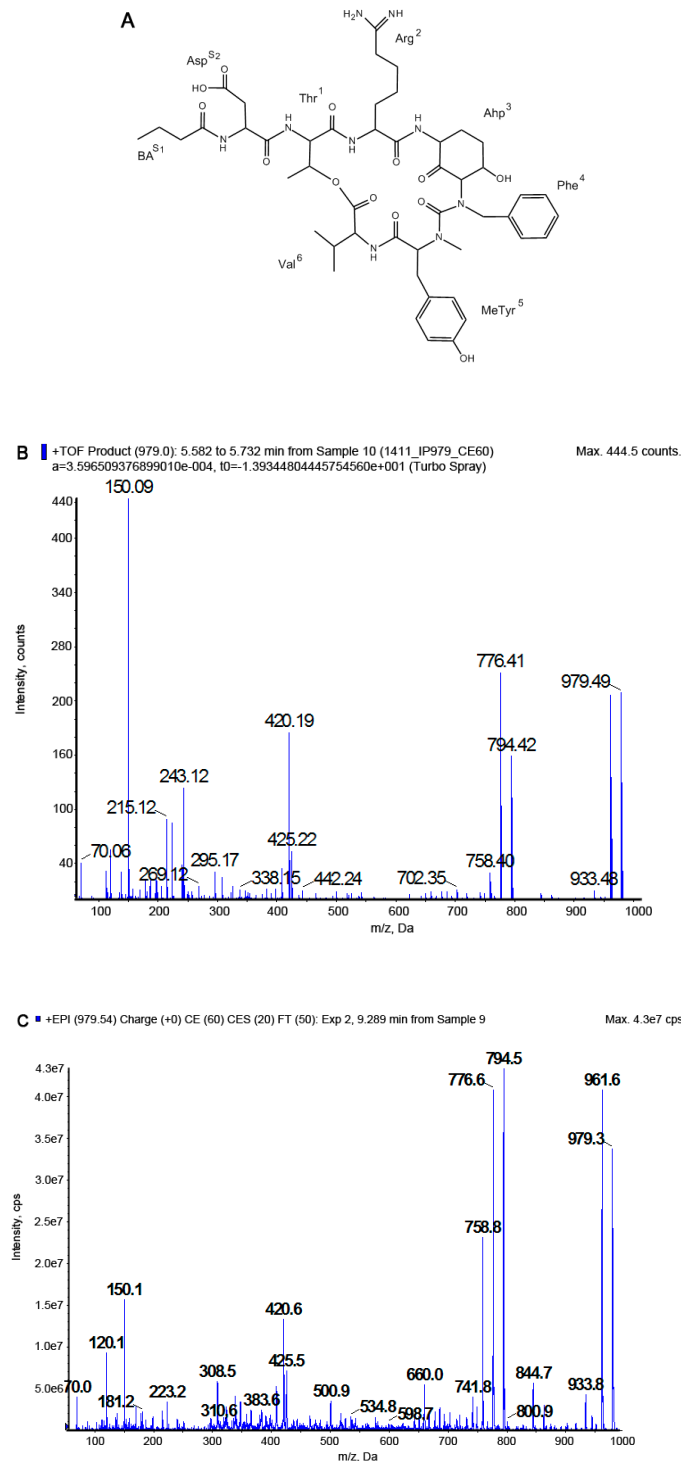

**Figure S8.** Chemical structure (A) and product ion mass spectra of cyanopeptolin CP978 [Thr+Arg+Ahp+Phe+MeTyr+Val]Asp+BA with precursor ion  $[M+H]^+$  at  $m/z$  979. The spectra were recorded with application of QTOF (B) and QTRAP (C) mass spectrometers. The mass signals were assigned to the following fragments: 961  $[M + H - H_2O]^+$ , 933  $[M + H - H_2O - CO]^+$ , 844  $[M + H - Val - 2H_2O]^+$ , 794  $[M + 2H - (Asp + BA)]^+$ , 776  $[M + 2H - (Asp + BA) - H_2O]^+$ , 758  $[M + 2H - (Asp + BA) - 2H_2O]^+$ , 659  $[M + 2H - Val - (Asp + BA) - 2H_2O]^+$ , 425  $[BA + Asp + Thr + Arg + H - H_2O]^+$ , 420  $[Ahp + Phe + MeTyr + H - H_2O]^+$ , 338  $[Arg + Thr + Val + H - H_2O]^+$ , 308  $[Phe(-N) + MeTyr + H]^+$ , 243  $[Ahp + Phe + H - H_2O]^+$ , 215  $[Ahp + Phe + H - H_2O - CO]^+$ , 150 MeTyr immonium ion, 120 Phe immonium ion, 70-Arg.



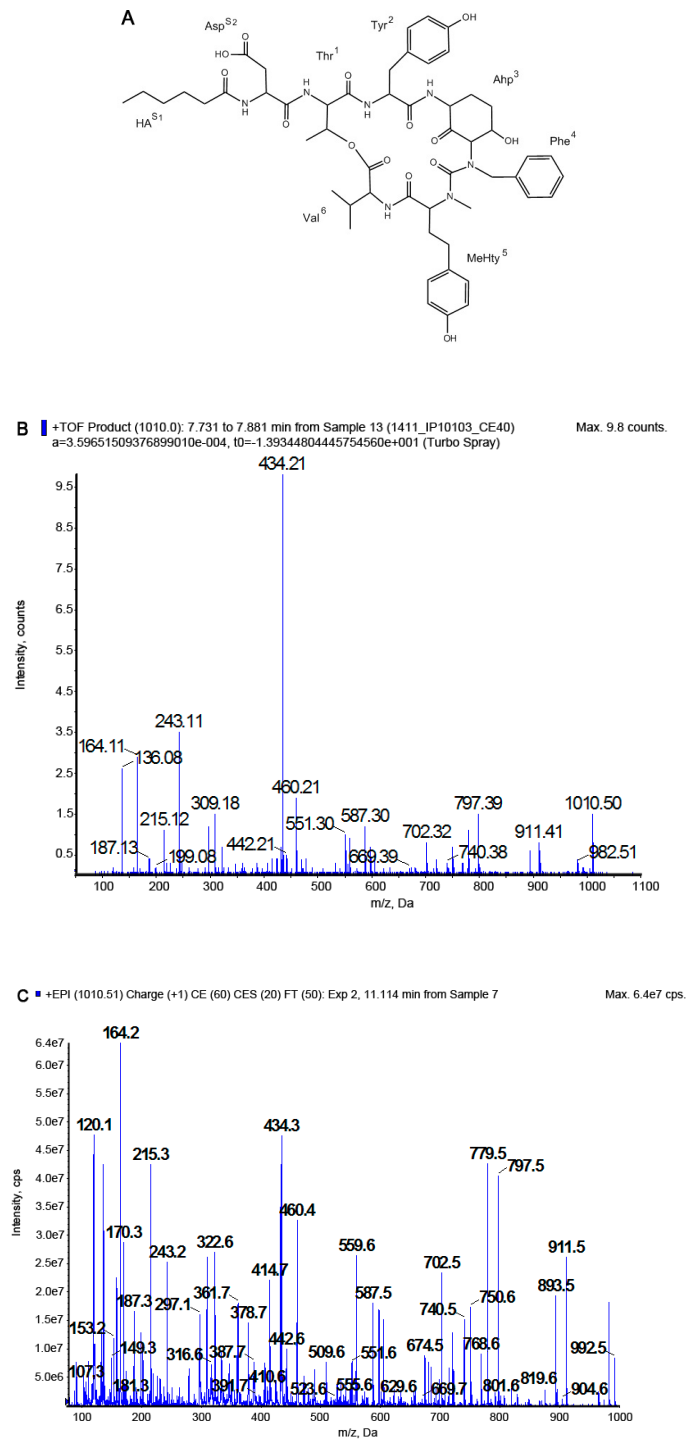

**Figure S9.** Chemical structure (A) and product ion mass spectra of cyanopeptolin CP1027 [Thr+Tyr+Ahp+Phe+MeHty+Val]Asp+HA with precursor ion  $[M+H-H_2O]^+$  at  $m/z$  1010. The spectra were recorded with application of QTOF (B) and QTRAP (C) mass spectrometers. The mass signals were assigned to the following fragments: 992  $[M+H-2H_2O]^+$ , 982  $[M+H-H_2O-CO]^+$ , 964  $[M+H-2H_2O-CO]^+$ , 911  $[M+H-Val-H_2O]^+$ , 893  $[M+H-Val-2H_2O]^+$ , 819  $[M+H-MeHty-H_2O]^+$ , 797  $[M+2H-(Asp+HA)-H_2O]^+$ , 779  $[M+2H-(Asp+HA)-2H_2O]^+$ , 751  $[M+2H-(Asp+HA)-2H_2O-CO]^+$ , 702  $[M+H-(Val+MeHty)-H_2O]^+$ , 674  $[M+H-(Val+MeHty)-H_2O-CO]^+$ , 460  $[M+H-(Val+MeHty+Phe+Ahp)-H_2O]^+$ , 442  $[M+H-(Val+MeHty+Phe+Ahp)-2H_2O]^+$ , 434  $[Ahp+Phe+MeHty+H-H_2O]^+$ , 322  $[Phe(-N)+MeHty+H]^+$ , 297  $[Asp+Thr+Val+H-H_2O]^+$ , 243  $[Ahp+Phe+H-H_2O]^+$ , 215  $[Ahp+Phe+H-H_2O-CO]^+$ , 164 MeHty immonium ion, 136 Tyr immonium ion, 120 Phe immonium ion.

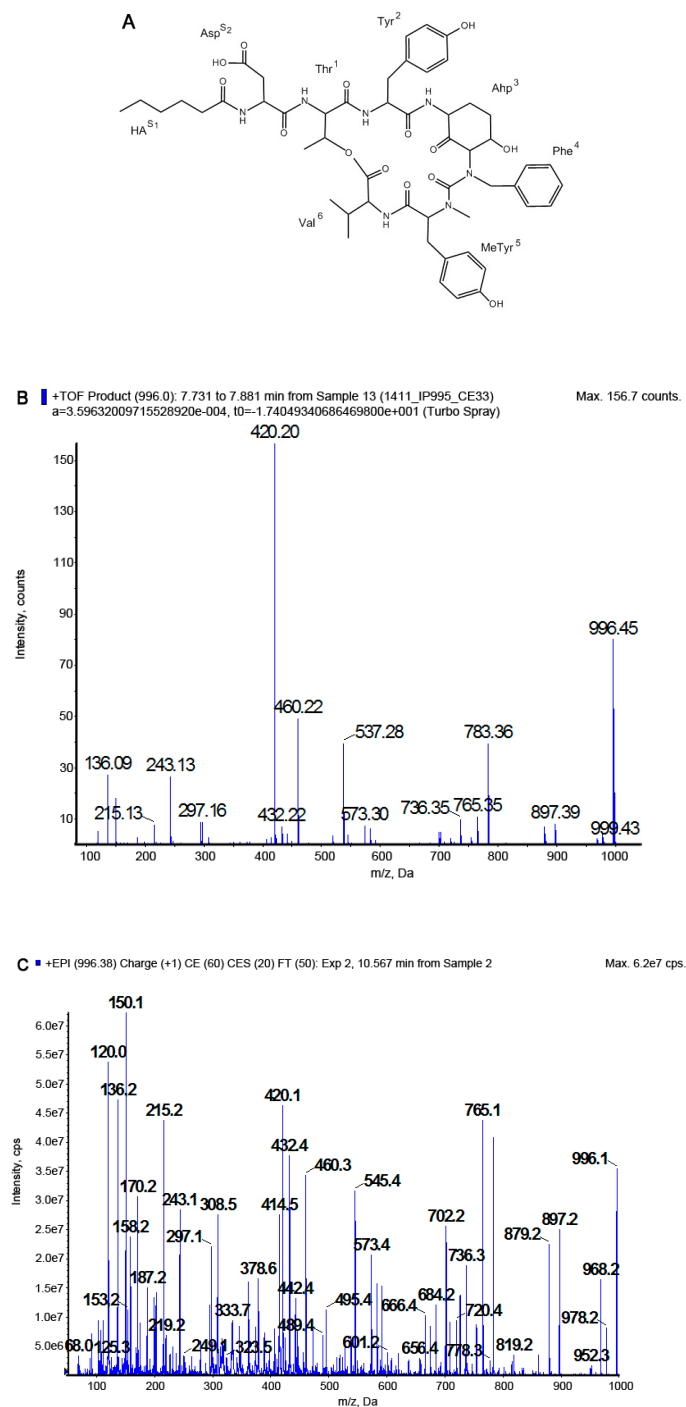

**Figure S10.** Chemical structure (A) and product ion mass spectra of cyanopeptolin CP1013 [Thr+Tyr+Ahp+Phe+MeTyr+Val]Asp+HA with precursor ion  $[M+H-H_2O]^+$  at  $m/z$  996. The spectra were recorded with application of QTOF (B) and QTRAP (C) mass spectrometers. The mass signals were assigned to the following fragments: 978  $[M+H-2H_2O]^+$ , 968  $[M+H-H_2O-CO]^+$ , 897  $[M+H-Val-H_2O]^+$ , 879  $[M+H-Val-2H_2O]^+$ , 819  $[M+H-MeTyr-H_2O]^+$ , 783  $[M+2H-(Asp+HA)-H_2O]^+$ , 765  $[M+2H-(Asp+HA)-2H_2O]^+$ , 736  $[M+H-(Asp+HA)-2H_2O-CO]^+$ , 720  $[M+H-(Val+MeTyr)-H_2O]^+$ , 702  $[M+H-(Val+MeTyr)-2H_2O]^+$ , 666  $[M+2H-Val-(Asp+HA)-2H_2O]^+$ , 460  $[M+H-(Val+MeTyr+Phe+Ahp)-H_2O]^+$ , 420  $[Ahp+Phe+MeTyr+H-H_2O]^+$ , 432  $[M+H-(Val+MeTyr+Phe+Ahp)-H_2O-CO]^+$ , 414  $[HA+Asp+Thr+Val+H]^+$ , 297  $[Asp+Thr+Val+H-H_2O]^+$ , 243  $[Ahp+Phe+H-H_2O]^+$ , 215  $[Ahp+Phe+H-H_2O-CO]^+$ , 150 MeTyr immonium ion, 136 Tyr immonium ion, 120 Phe immonium ion.

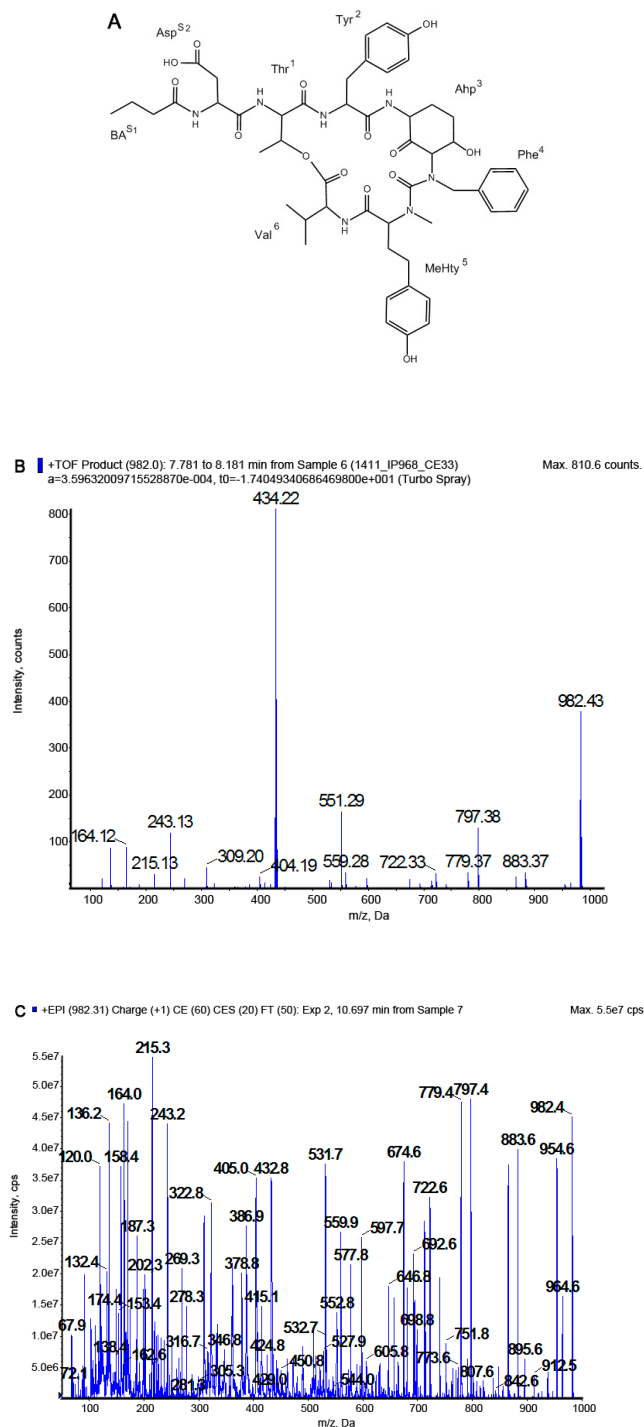

**Figure S11.** Chemical structure (A) and product ion mass spectra of cyanopeptolin CP999 [Thr+Tyr+Ahp+Phe+MeHty+Val]Asp+BA with precursor ion  $[M+H-H_2O]^+$  at  $m/z$  982. The spectra were recorded with application of QTOF (B) and QTRAP (C) mass spectrometers. The mass signals were assigned to the following fragments: 964  $[M+H-2H_2O]^+$ , 954  $[M+H-H_2O-CO]^+$ , 883  $[M+H-Val-H_2O]^+$ , 865  $[M+H-Val-2H_2O]^+$ , 797  $[M+2H-(Asp+BA)-H_2O]^+$ , 779  $[M+2H-(Asp+BA)-2H_2O]^+$ , 751  $[M+2H-(Asp+BA)-2H_2O-CO]^+$ , 692  $[M+H-(Val+MeHty)-H_2O]^+$ , 674  $[M+H-(Val+MeHty)-2H_2O]^+$ , 698  $[M+2H-Val-(Asp+BA)-H_2O]^+$ , 680  $[M+2H-Val-(Asp+BA)-2H_2O]^+$ , 646  $[M+H-(Val+MeHty)-2H_2O-CO]^+$ , 434  $[Ahp+Phe+MeHty+H-H_2O]^+$ , 432  $[M+H-(Val+MeHty+Phe+Ahp)-H_2O]^+$ , 386  $[BA+Asp+Thr+Val+H]^+$ , 322  $[Phe(-N)+MeHty+H]^+$ , 269  $[Asp+Thr+Val+H-H_2O-CO]^+$ , 243  $[Ahp+Phe+H-$

$\text{H}_2\text{O}^+$ , 215 [Ahp + Phe + H -  $\text{H}_2\text{O}$  - CO] $^+$ , 164 MeTyr immonium ion, 136 Tyr immonium ion, 120 Phe immonium ion.

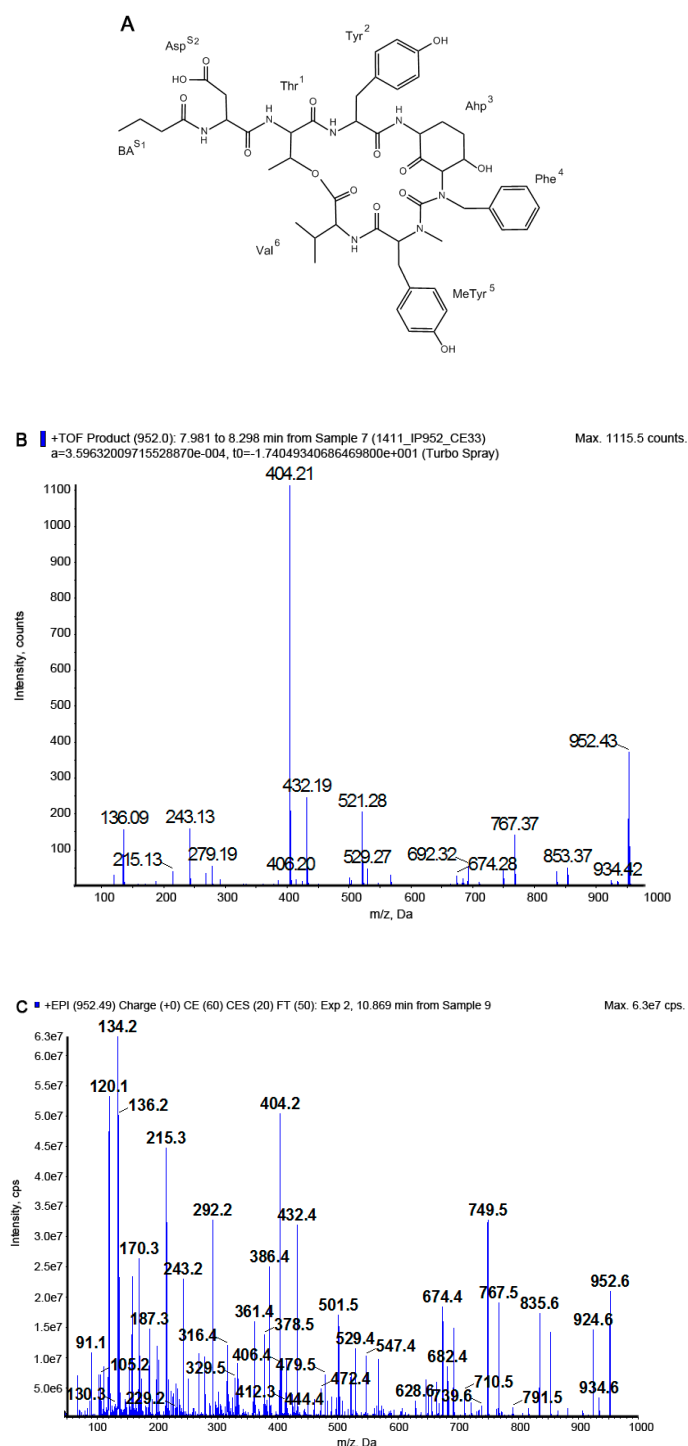

**Figure S12.** Chemical structure (A) and product ion mass spectra of cyanopeptolin CP969 [Thr+Tyr+Ahp+Phe+MePhe+Val]Asp+BA with precursor ion  $[\text{M} + \text{H} - \text{H}_2\text{O}]^+$  at  $m/z$  952. The spectra were recorded with application of QTOF (B) and QTRAP (C) mass spectrometers. The mass signals were assigned to the following fragments: 934  $[\text{M} + \text{H} - 2\text{H}_2\text{O}]^+$ , 924  $[\text{M} + \text{H} - \text{H}_2\text{O} - \text{CO}]^+$ , 853  $[\text{M} + \text{H} - \text{Val} - \text{H}_2\text{O}]^+$ , 835  $[\text{M} + \text{H} - \text{Val} - 2\text{H}_2\text{O}]^+$ , 791  $[\text{M} + \text{H} - \text{MePhe} - \text{H}_2\text{O}]^+$ , 767  $[\text{M} + 2\text{H} - (\text{Asp} + \text{BA}) - \text{H}_2\text{O}]^+$ , 749  $[\text{M} + 2\text{H} - (\text{Asp} + \text{BA}) - 2\text{H}_2\text{O}]^+$ , 692  $[\text{M} + \text{H} - (\text{Val} + \text{MePhe}) - \text{H}_2\text{O}]^+$ , 674  $[\text{M} + \text{H} - (\text{Val} + \text{MePhe}) - 2\text{H}_2\text{O}]^+$ , 432  $[\text{M} + \text{H} - (\text{Val} + \text{MePhe} + \text{Phe} + \text{Ahp}) - \text{H}_2\text{O}]^+$ , 414  $[\text{M} + \text{H} - (\text{Val} + \text{MePhe} + \text{Phe} + \text{Ahp}) - 2\text{H}_2\text{O}]^+$ , 404  $[\text{Ahp} + \text{Phe} + \text{MePhe} + \text{H} - \text{H}_2\text{O}]^+$ ,

386 [BA + Asp + Thr + Val + H]<sup>+</sup>, 297 [Asp + Thr + Val + H - H<sub>2</sub>O]<sup>+</sup>, 243 [Ahp + Phe + H - H<sub>2</sub>O]<sup>+</sup>, 215 [Ahp + Phe + H - H<sub>2</sub>O - CO]<sup>+</sup>, 134 MePhe immonium ion, 136 Tyr immonium ion, 120 Phe immonium ion.

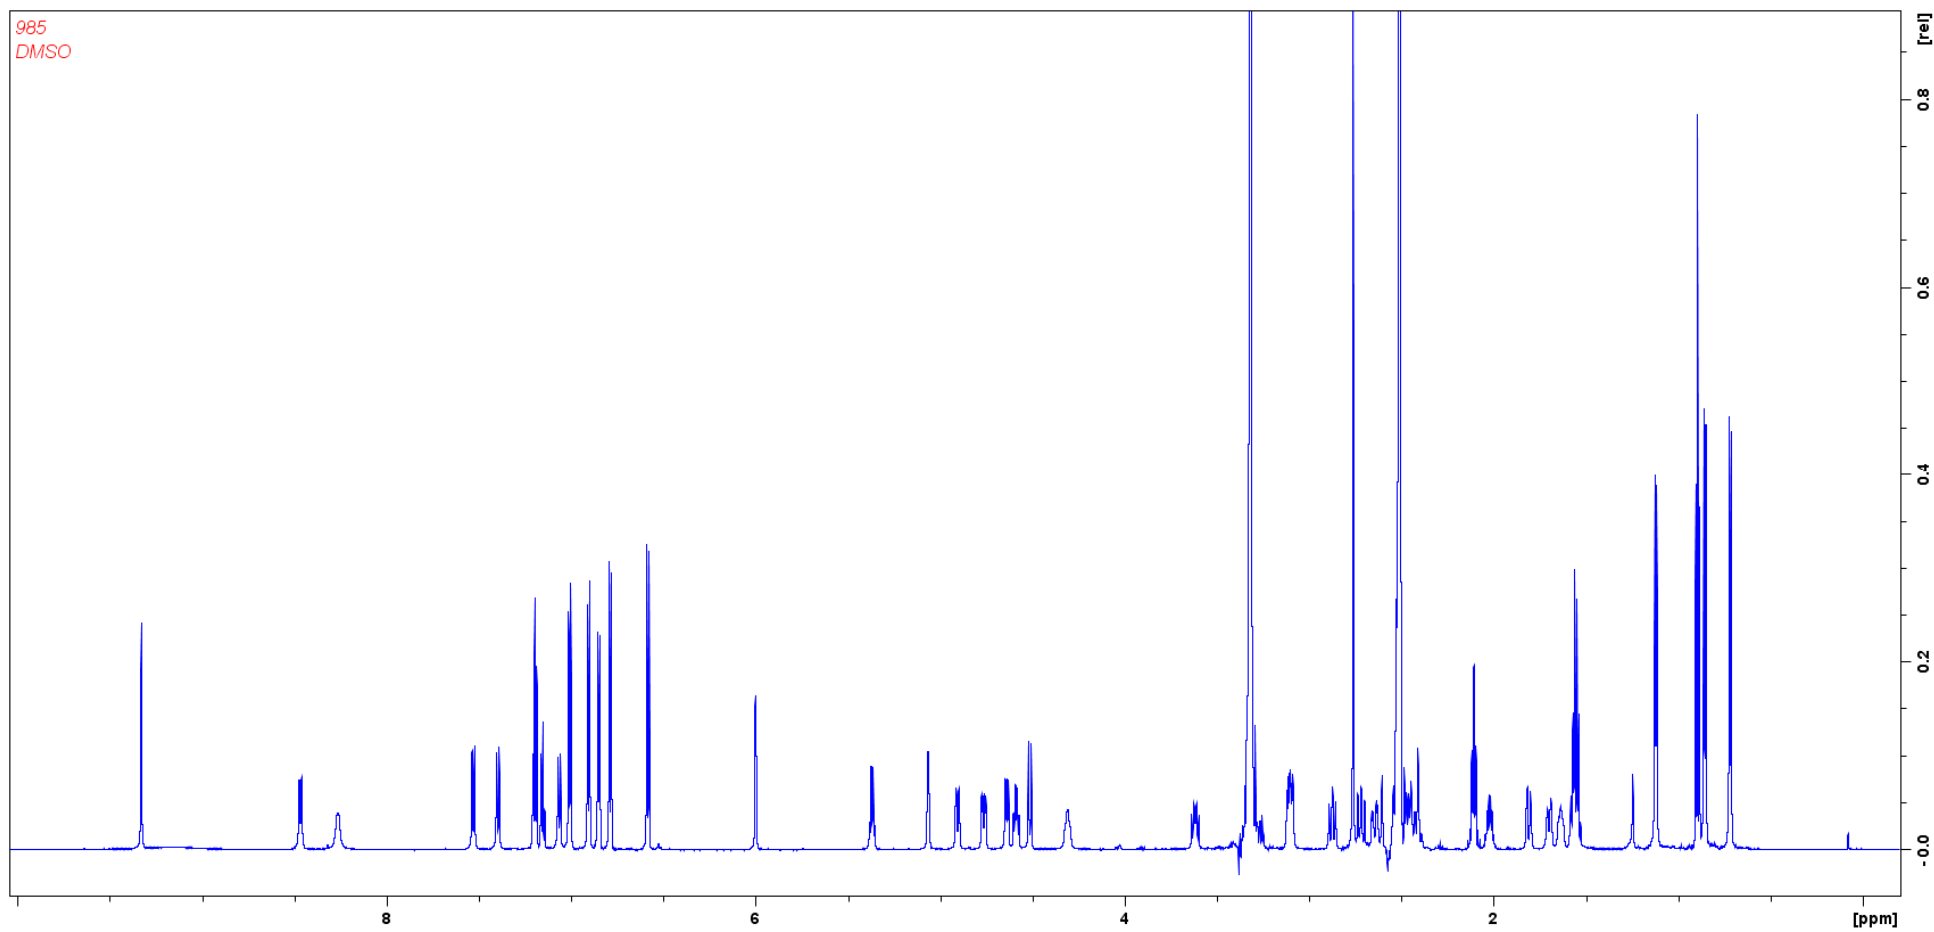

**Figure S13.**  $^1\text{H}$  NMR Spectrum of cyanopeptolin CP985 in  $\text{DMSO-d}_6$ .

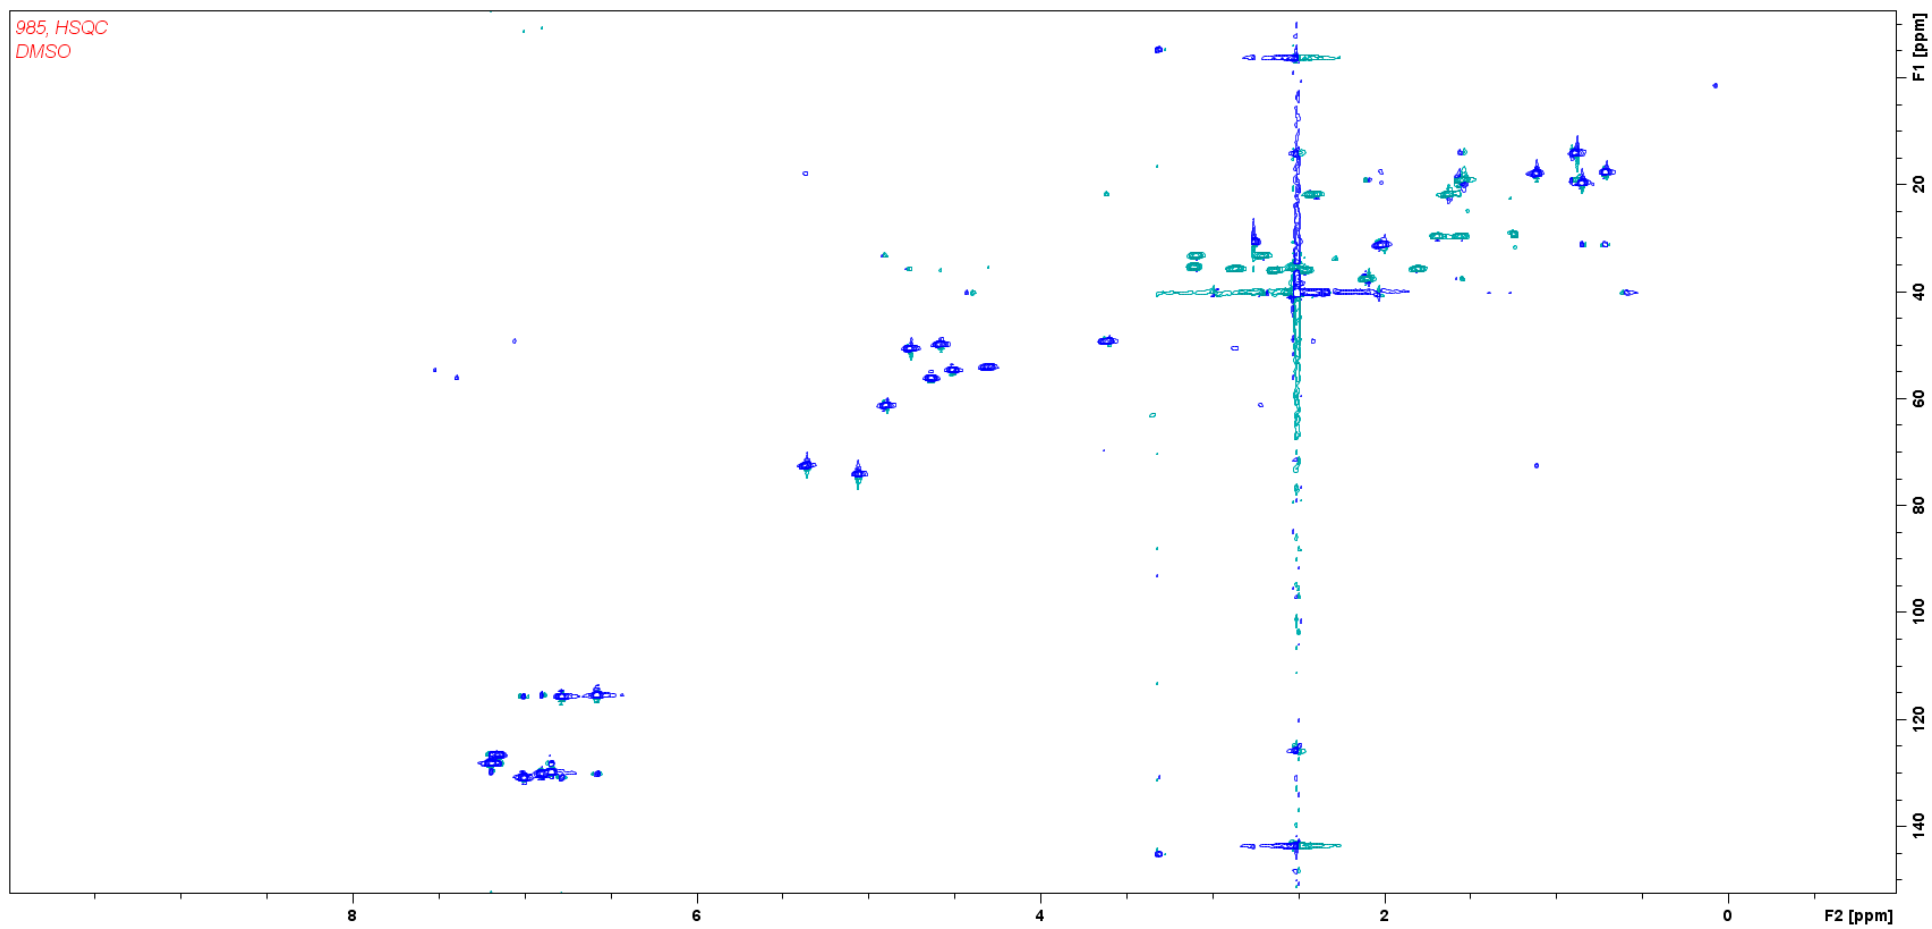

Figure S14. HSQC Spectrum of cyanopeptolin CP985 in DMSO- $d_6$ .

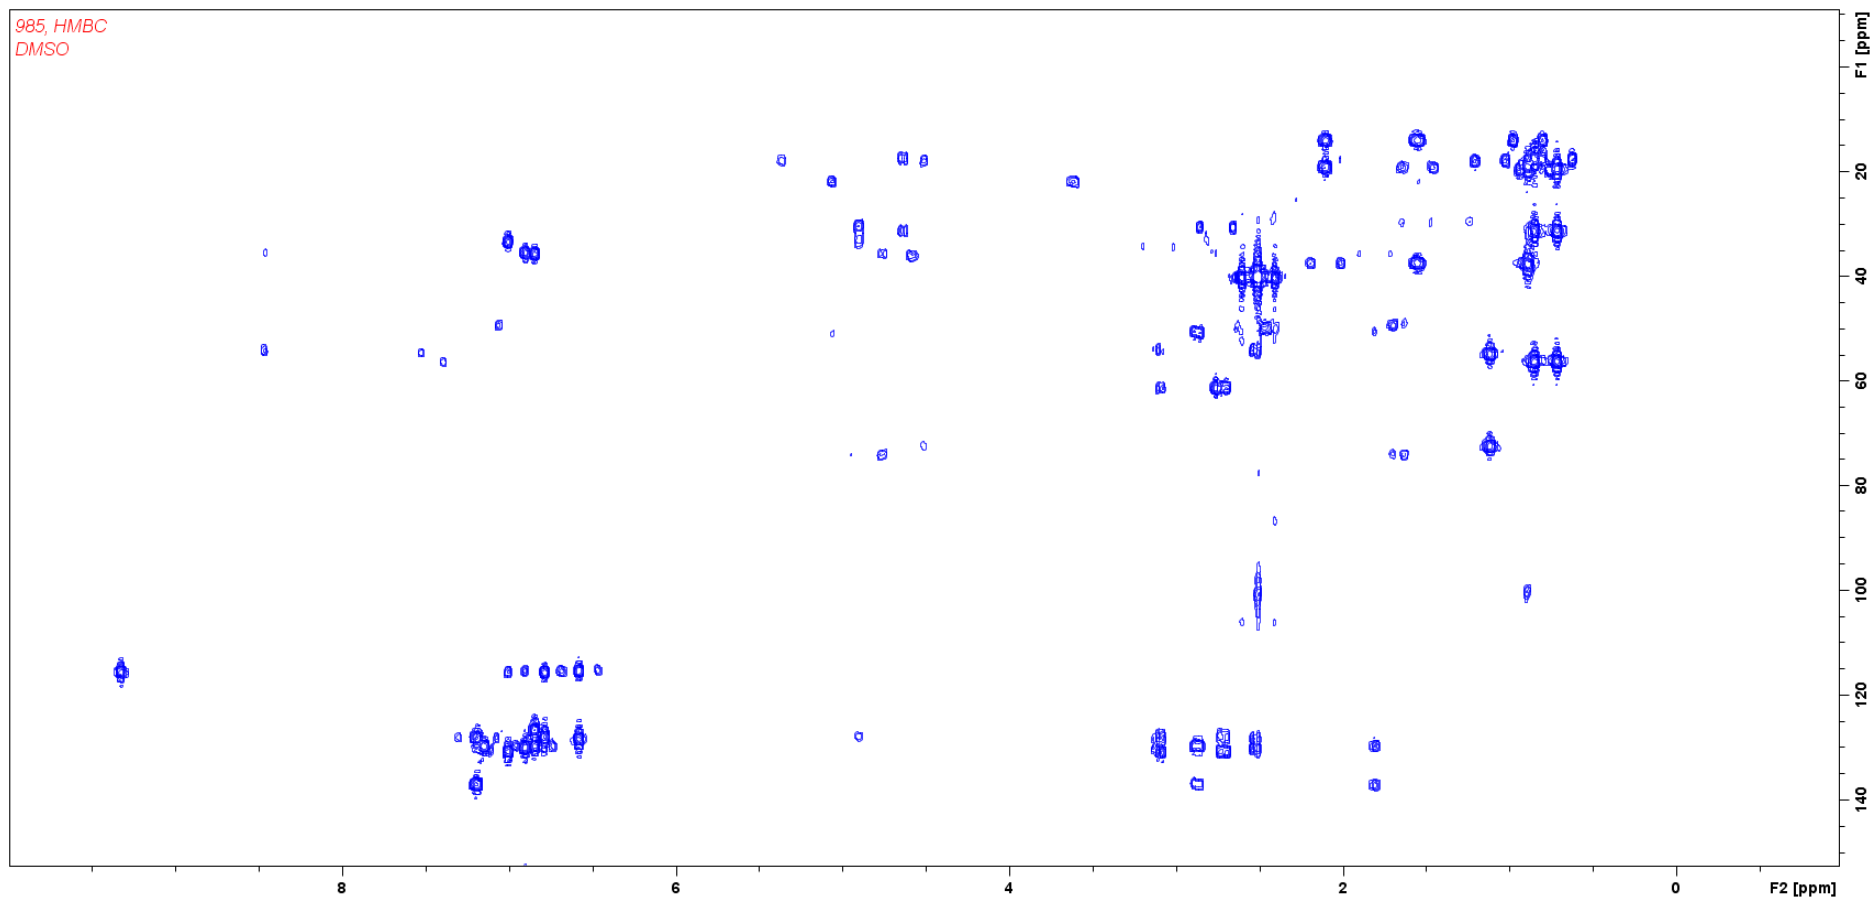

Figure S15a. HMBC Spectrum of cyanopeptolin CP985 in DMSO-d<sub>6</sub>.



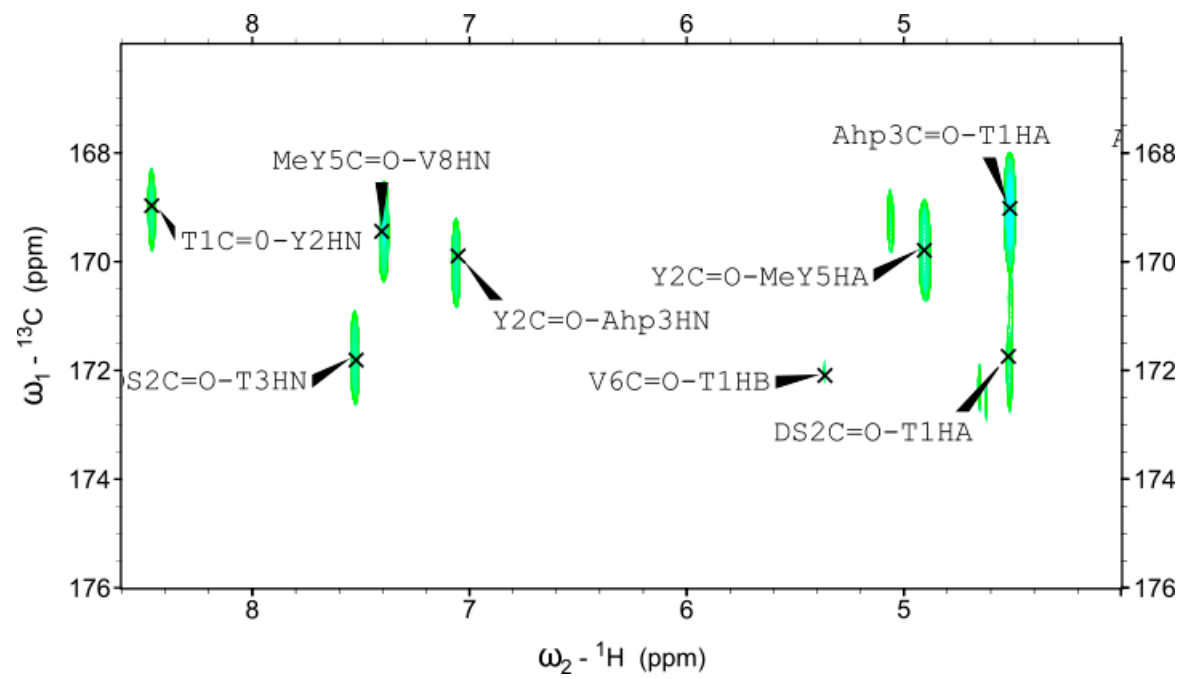

**Figure S15b.** Detailed NH – C=O region of the HMBC spectrum of cyanopeptolin CP985.

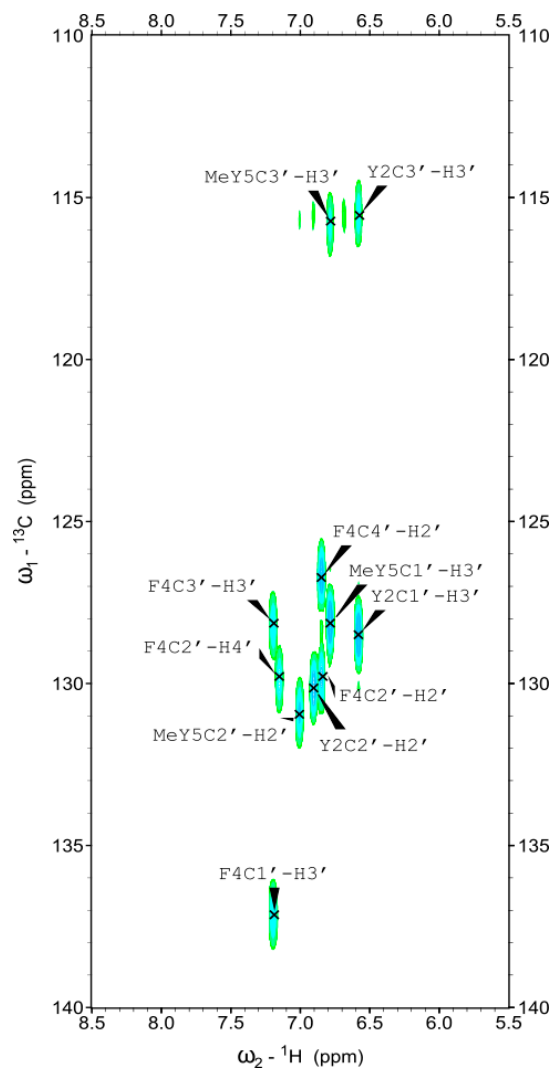

**Figure S15c.** Detailed aromatic region of the HMBC spectrum of cyanopeptolin CP985.

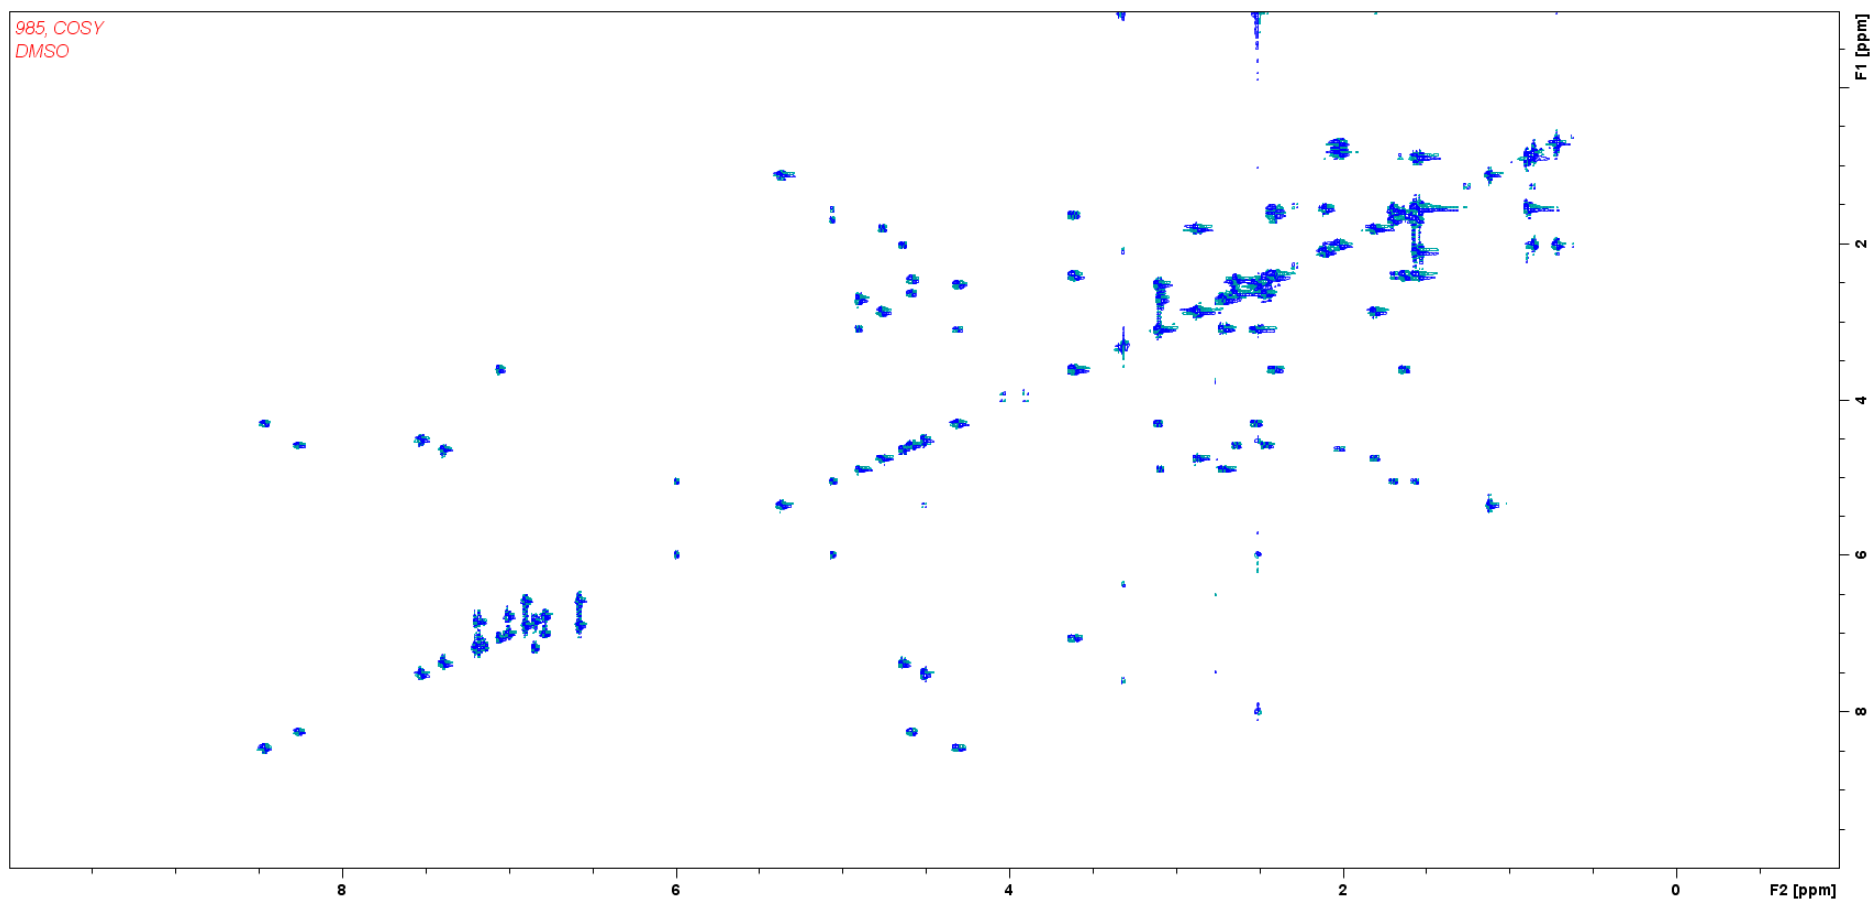

Figure S16. COSY Spectrum of cyanopeptolin CP985 in DMSO-d<sub>6</sub>.

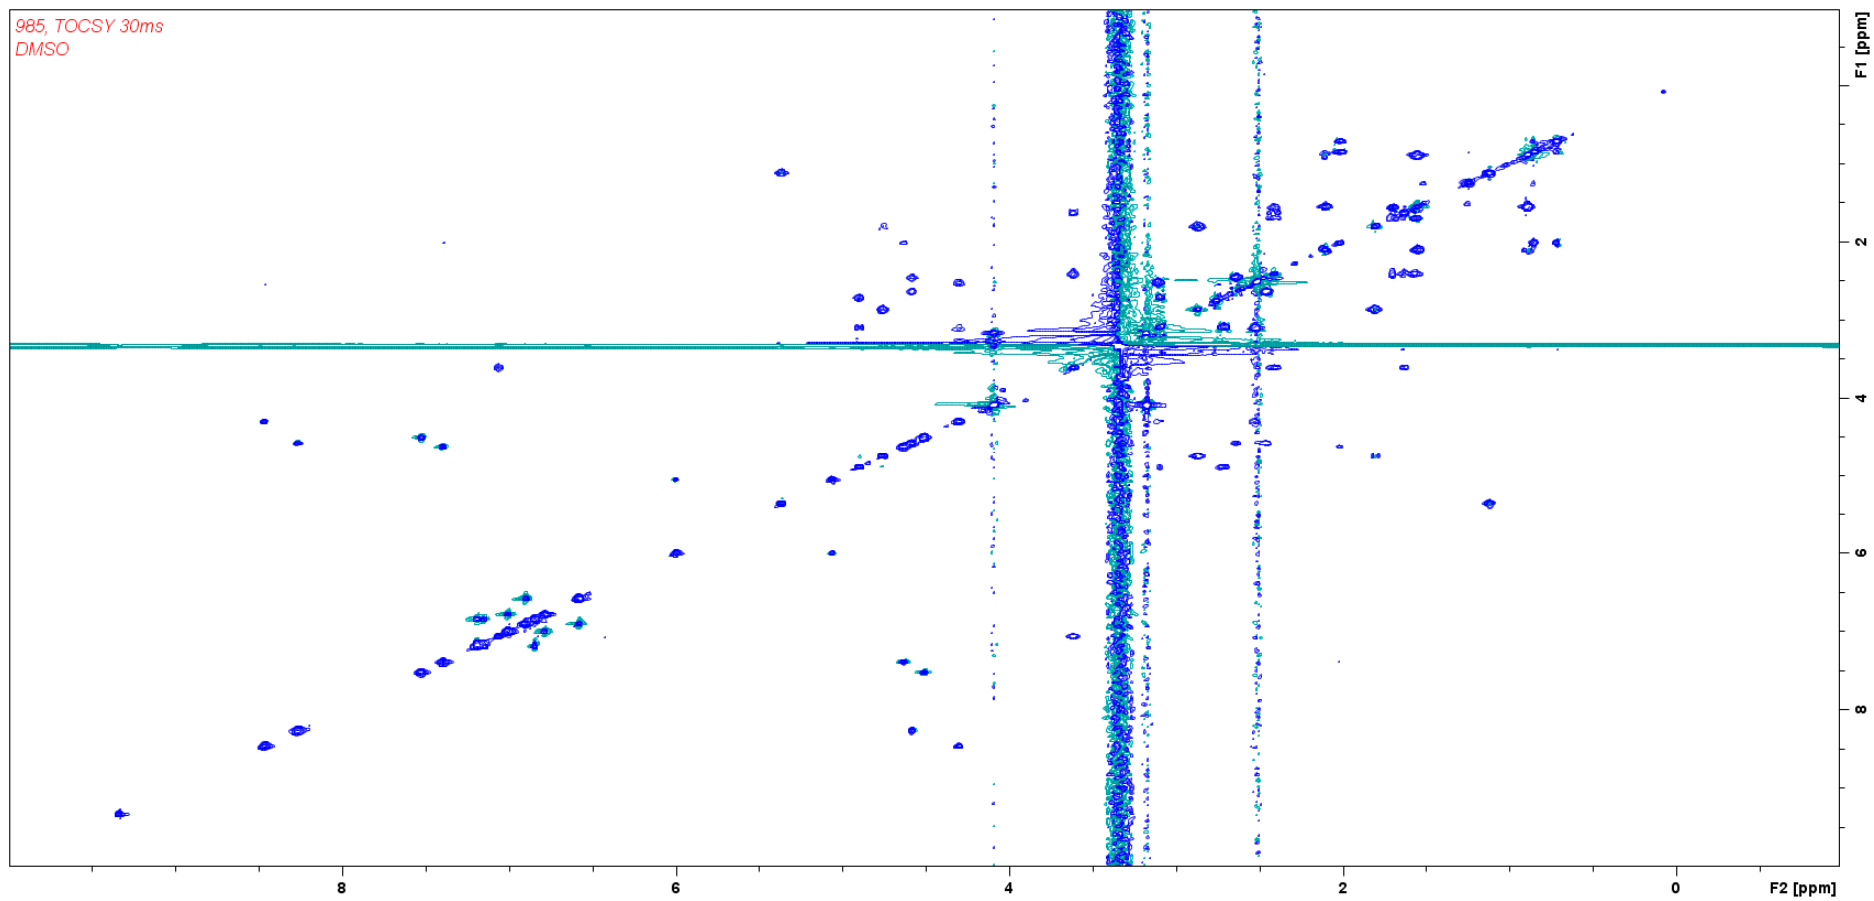

Figure S17a. TOCSY Spectrum of cyanopeptolin CP985 in DMSO-d<sub>6</sub>.

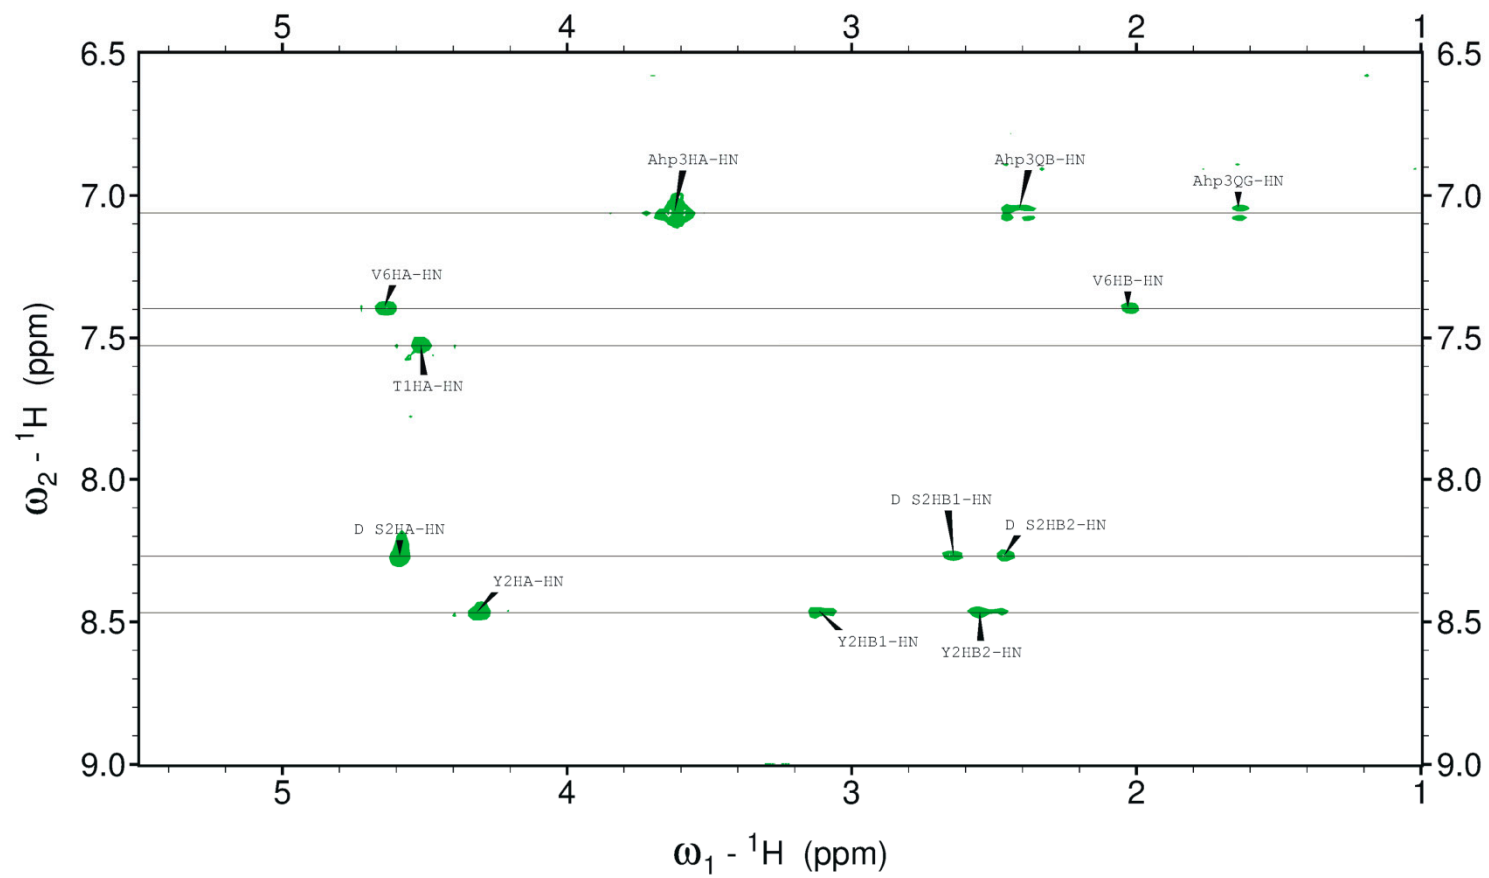

**Figure S17b.** Amino acid spin systems in the diagnostic region of the TOCSY spectrum of cyanopeptolin CP985.

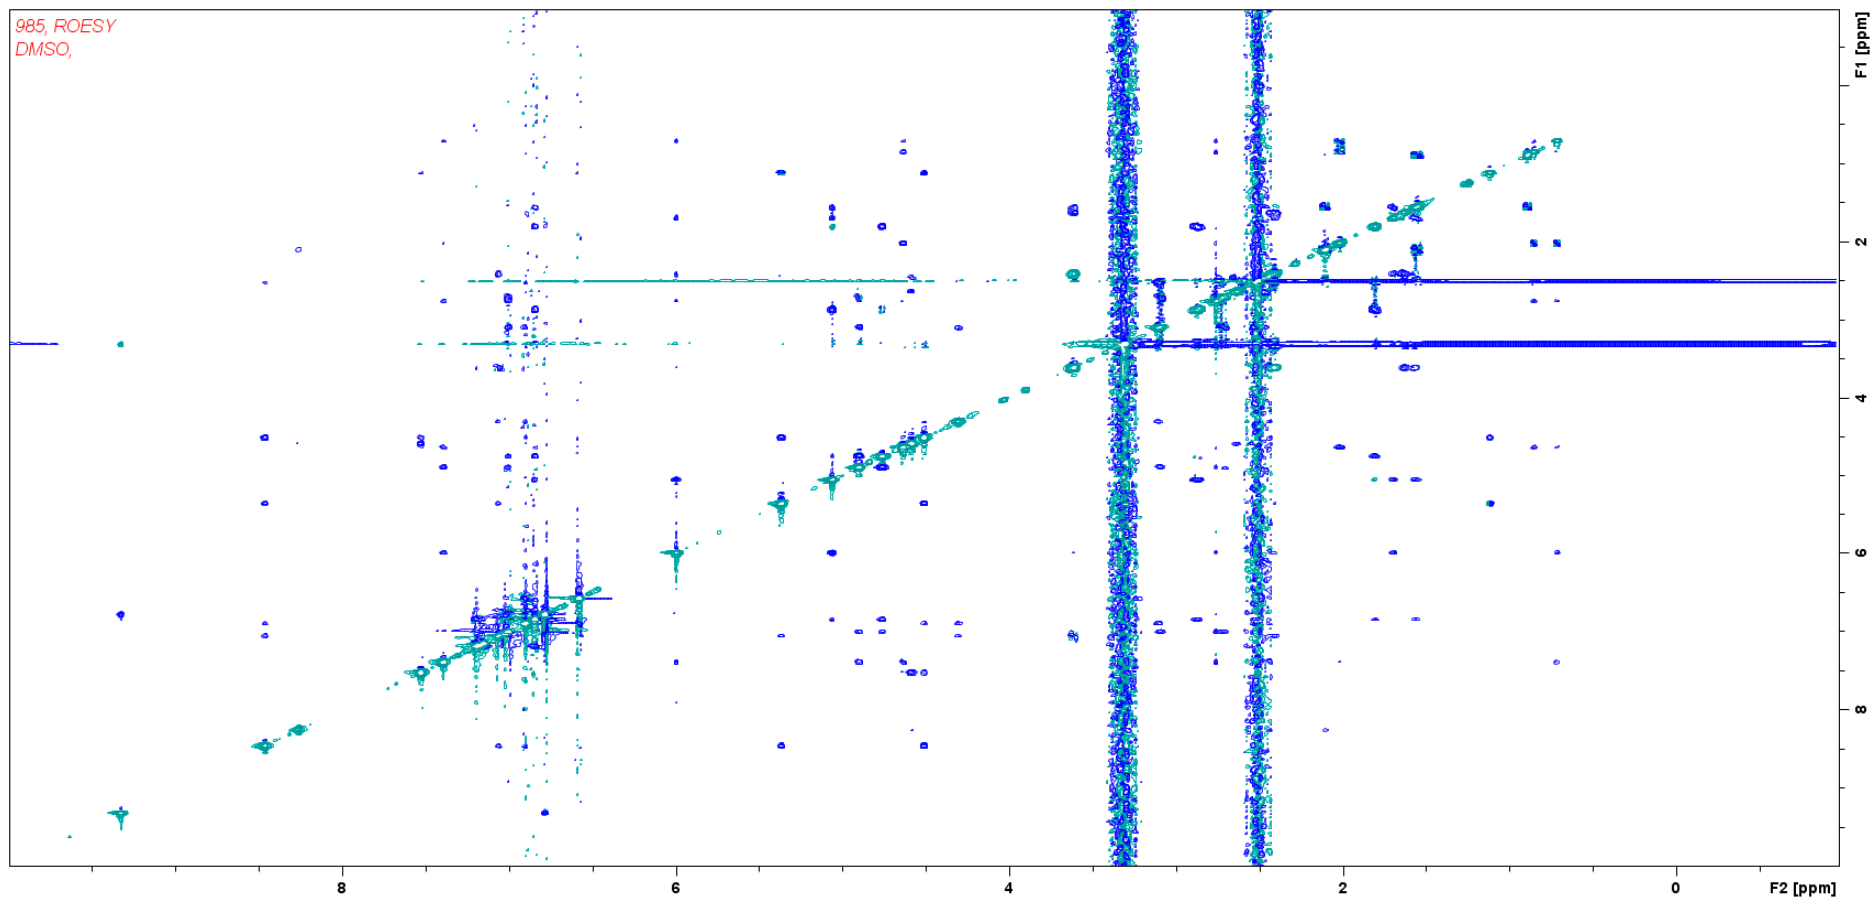

Figure S18a. ROESY Spectrum of cyanopeptolin CP985 in DMSO-d<sub>6</sub>.

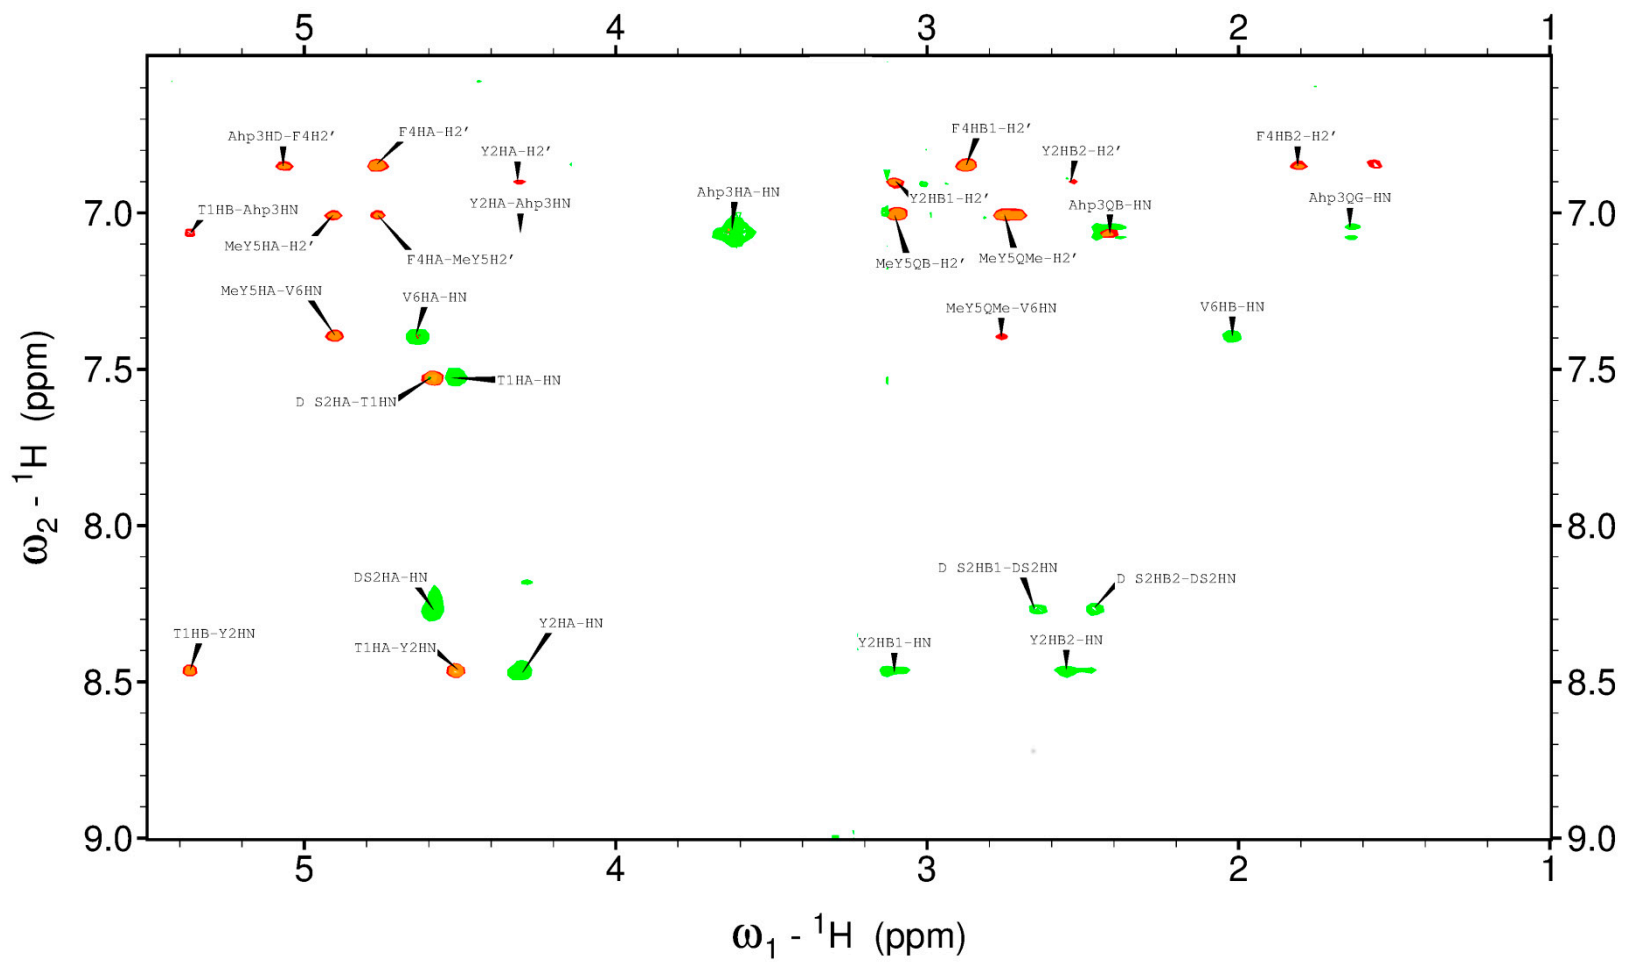

Figure S18b. Overlaid fragments of TOCSY (green) and ROESY (red) spectra of cyanopeptolin CP985.

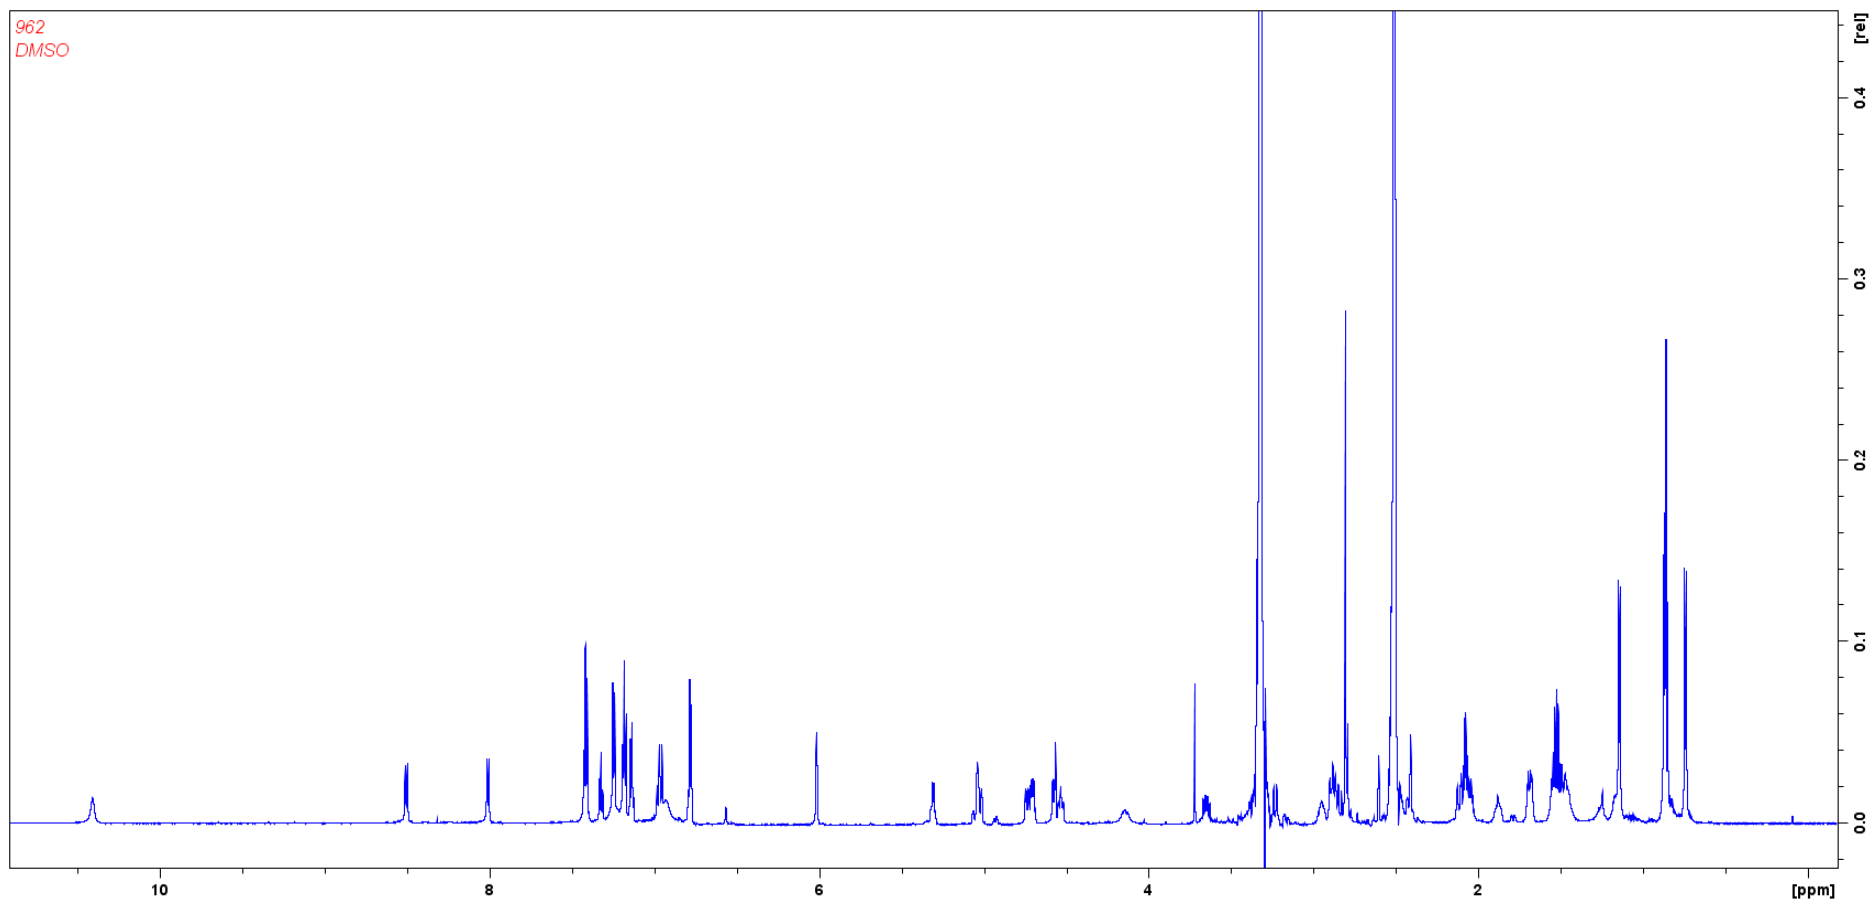

**Figure S19.**  $^1\text{H}$  NMR Spectrum of cyanopeptolin CP962 in  $\text{DMSO-d}_6$ .



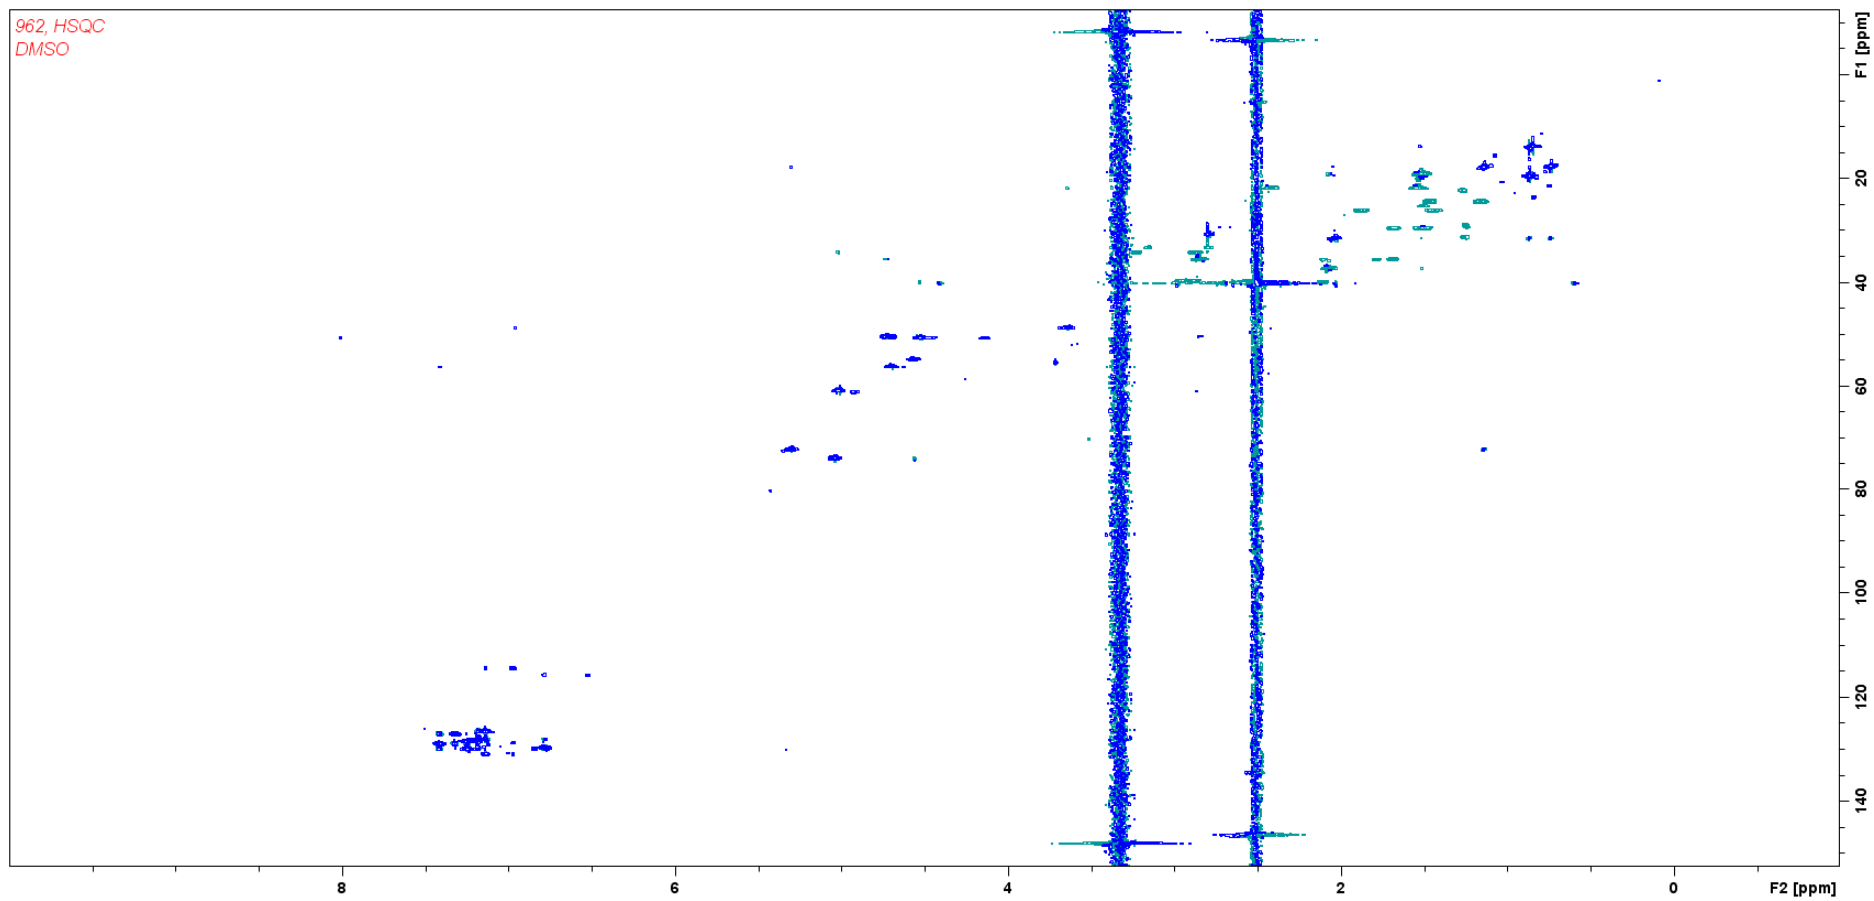

Figure S20. HSQC Spectrum of cyanopeptolin CP962 in DMSO-d<sub>6</sub>.

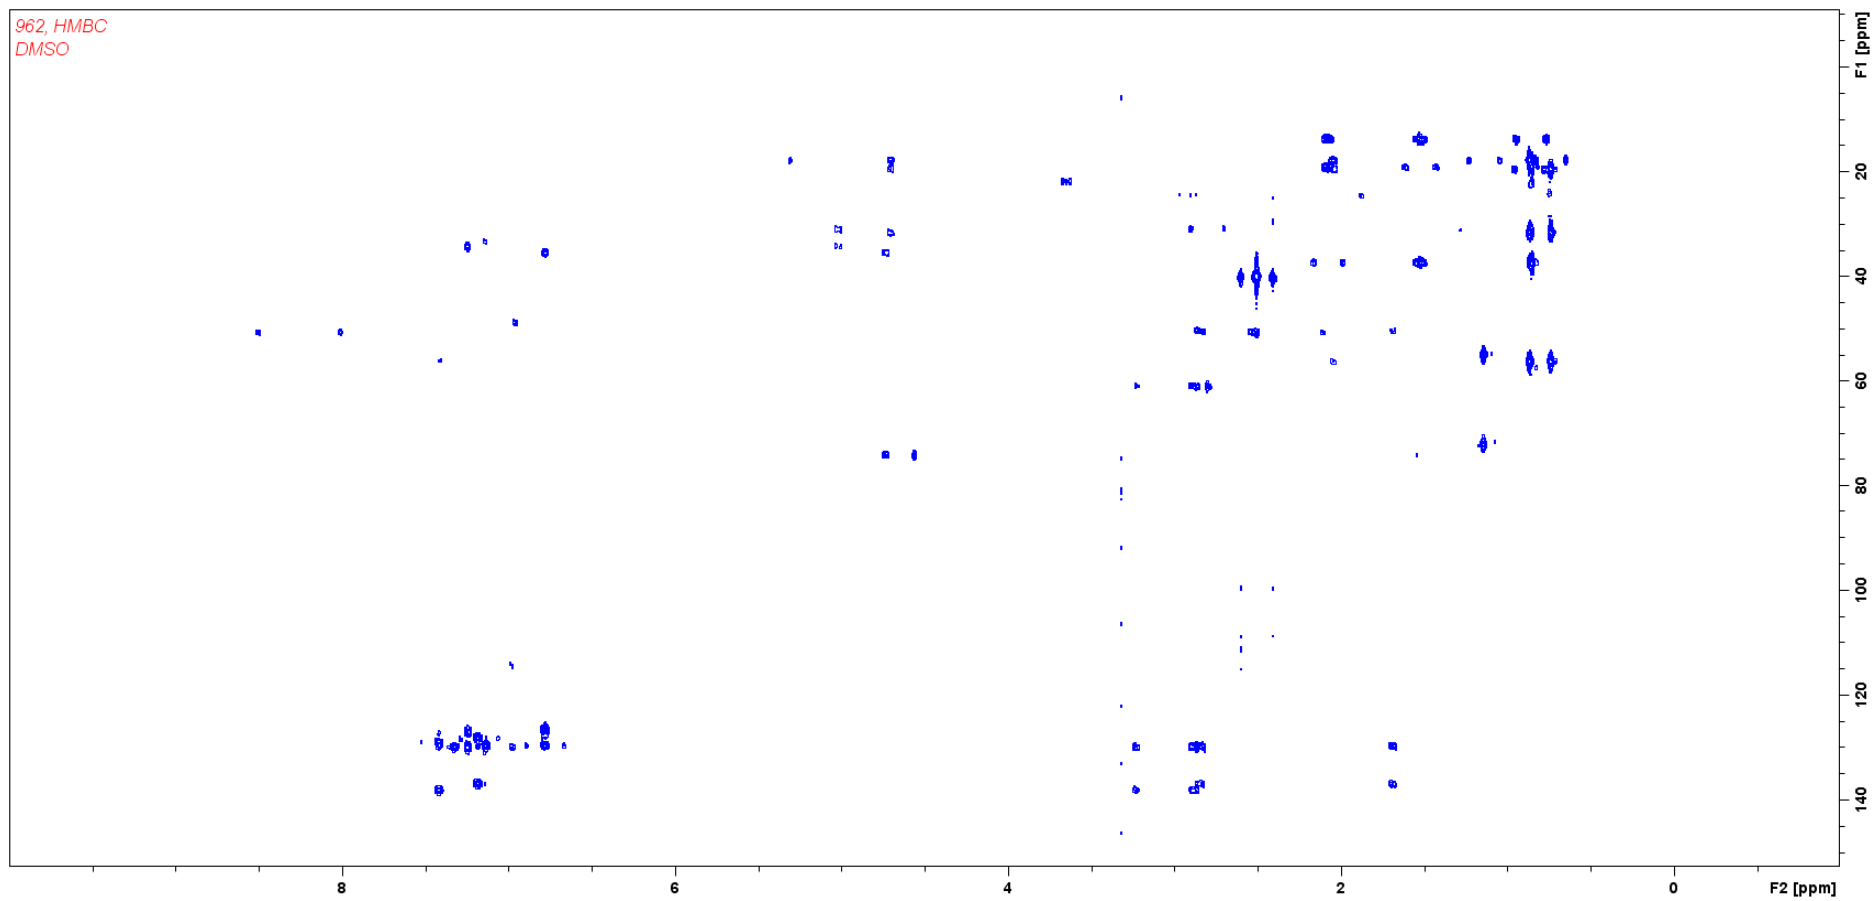

**Figure S21a.** HMBC Spectrum of cyanopeptolin CP962 in DMSO-d<sub>6</sub>.

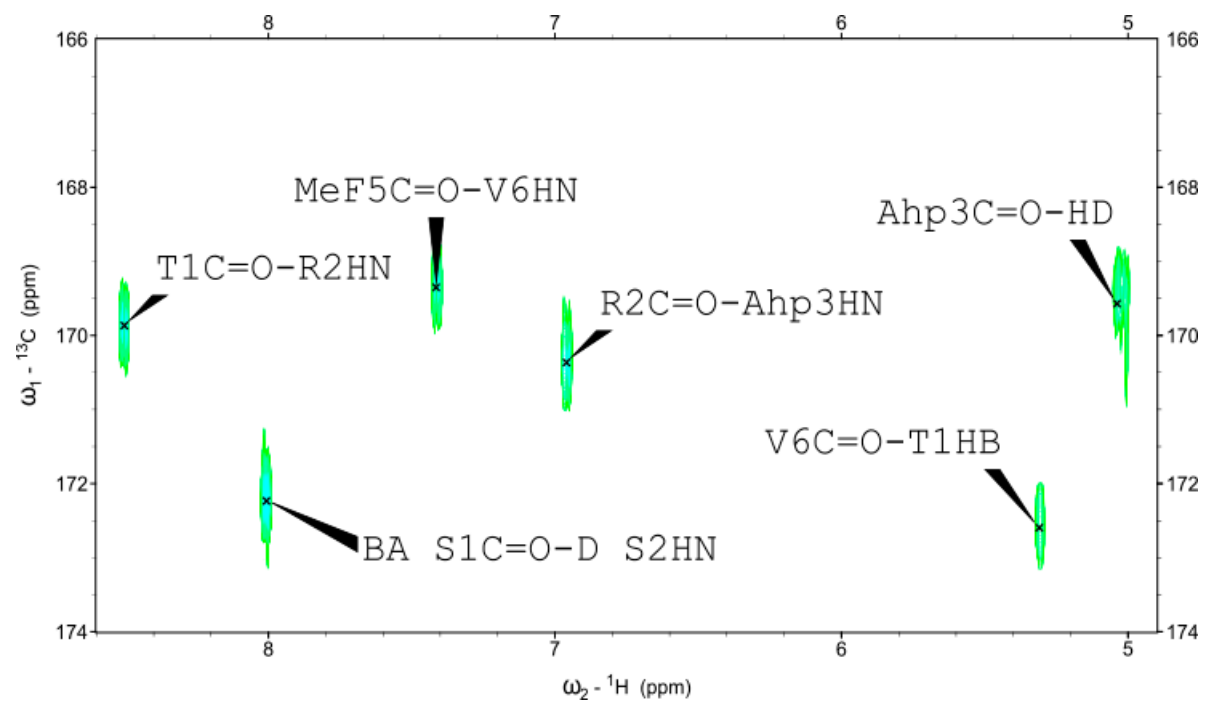

**Figure S21b.** Detailed NH - C=O region of the HMBC spectrum of cyanopeptolin CP962.

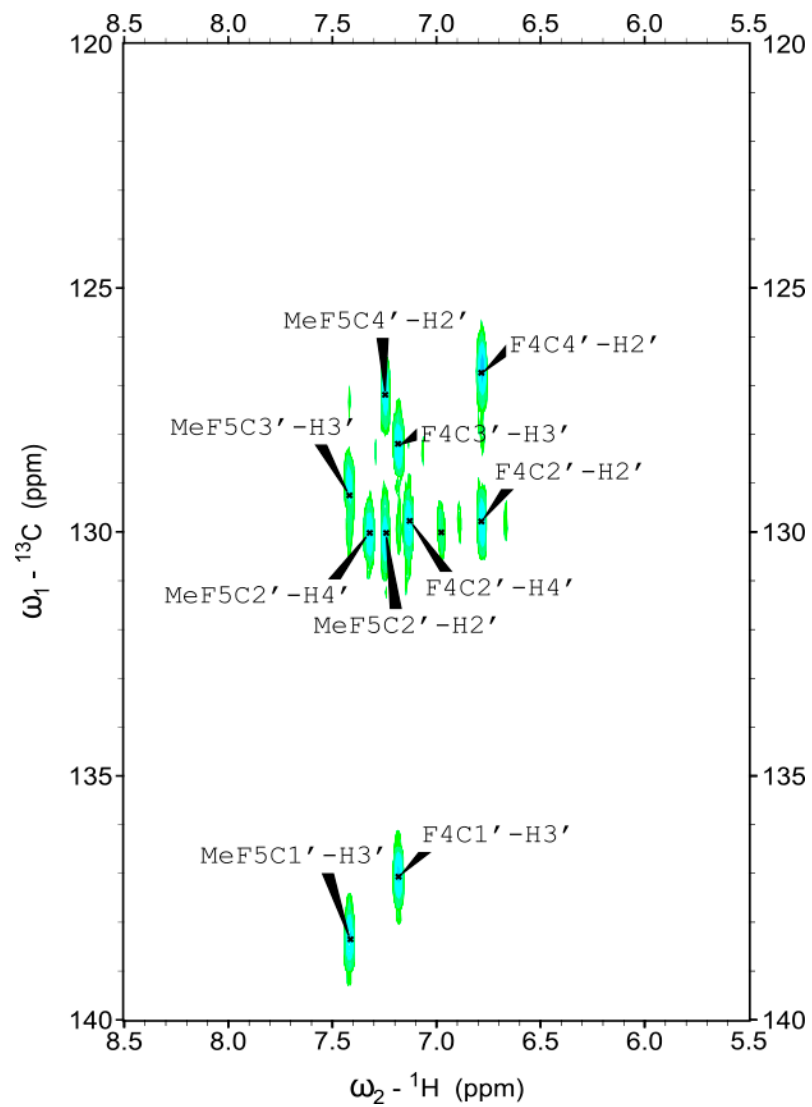

Figure S21c. Detailed aromatic region of the HMBC spectrum of cyanopeptolin CP962.

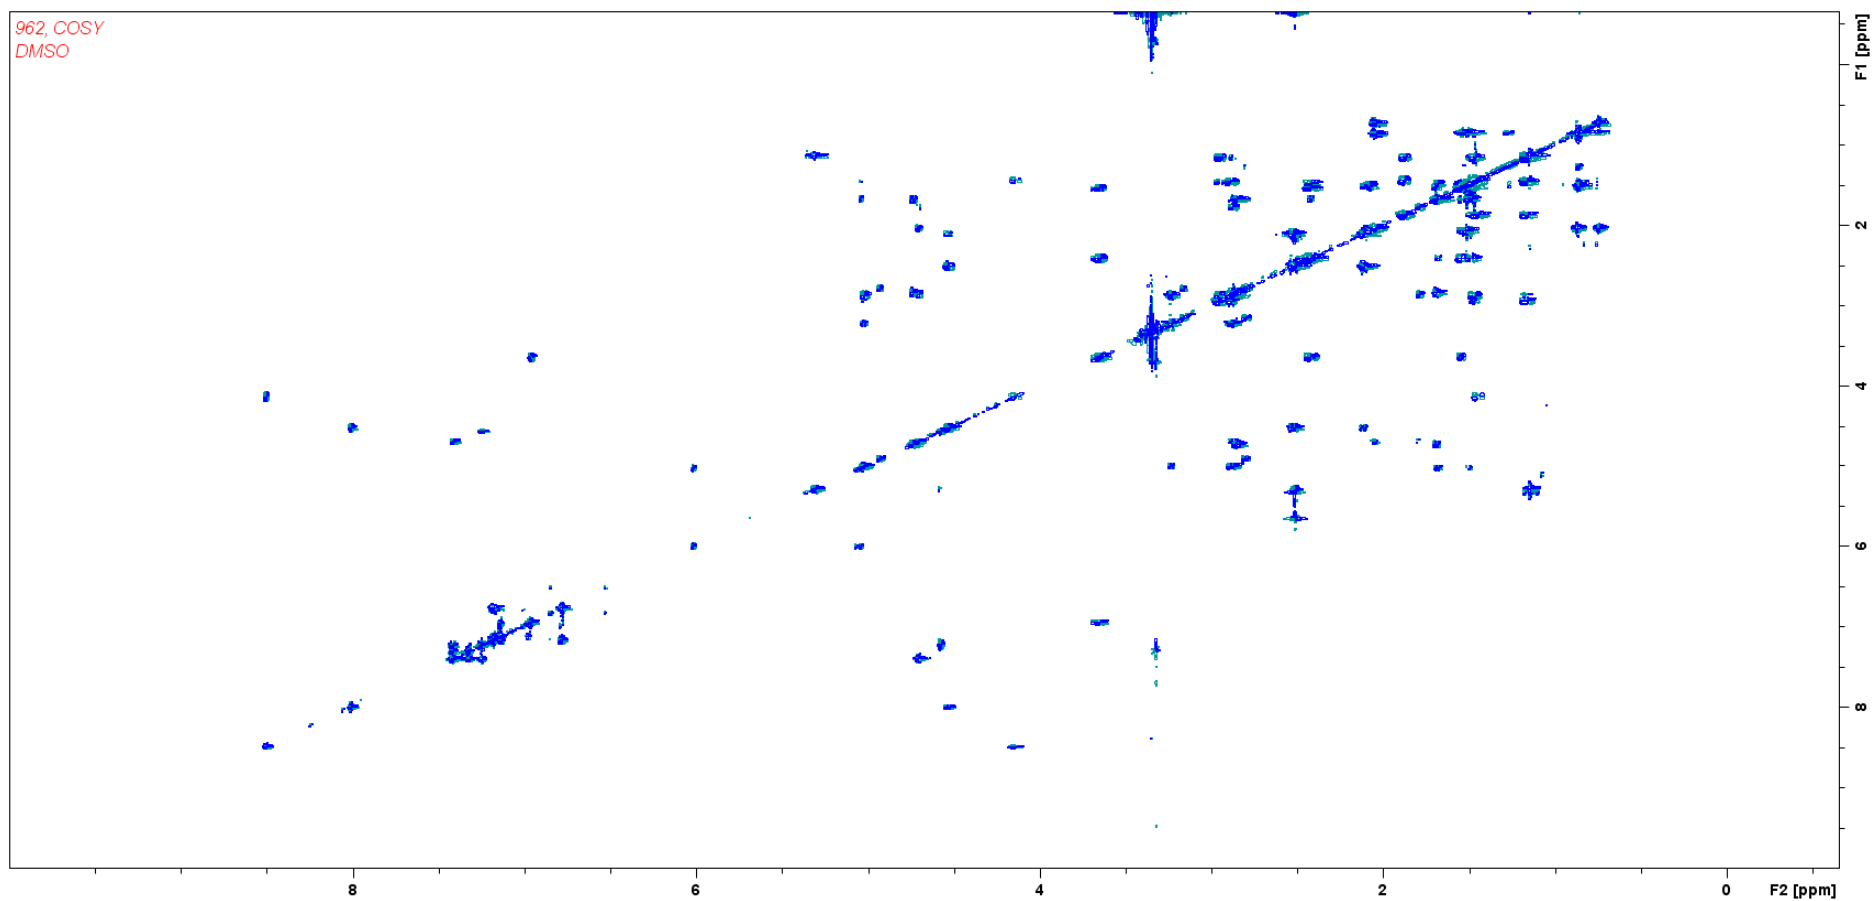

Figure S22. COSY Spectrum of cyanopeptolin CP962 in DMSO-d<sub>6</sub>.

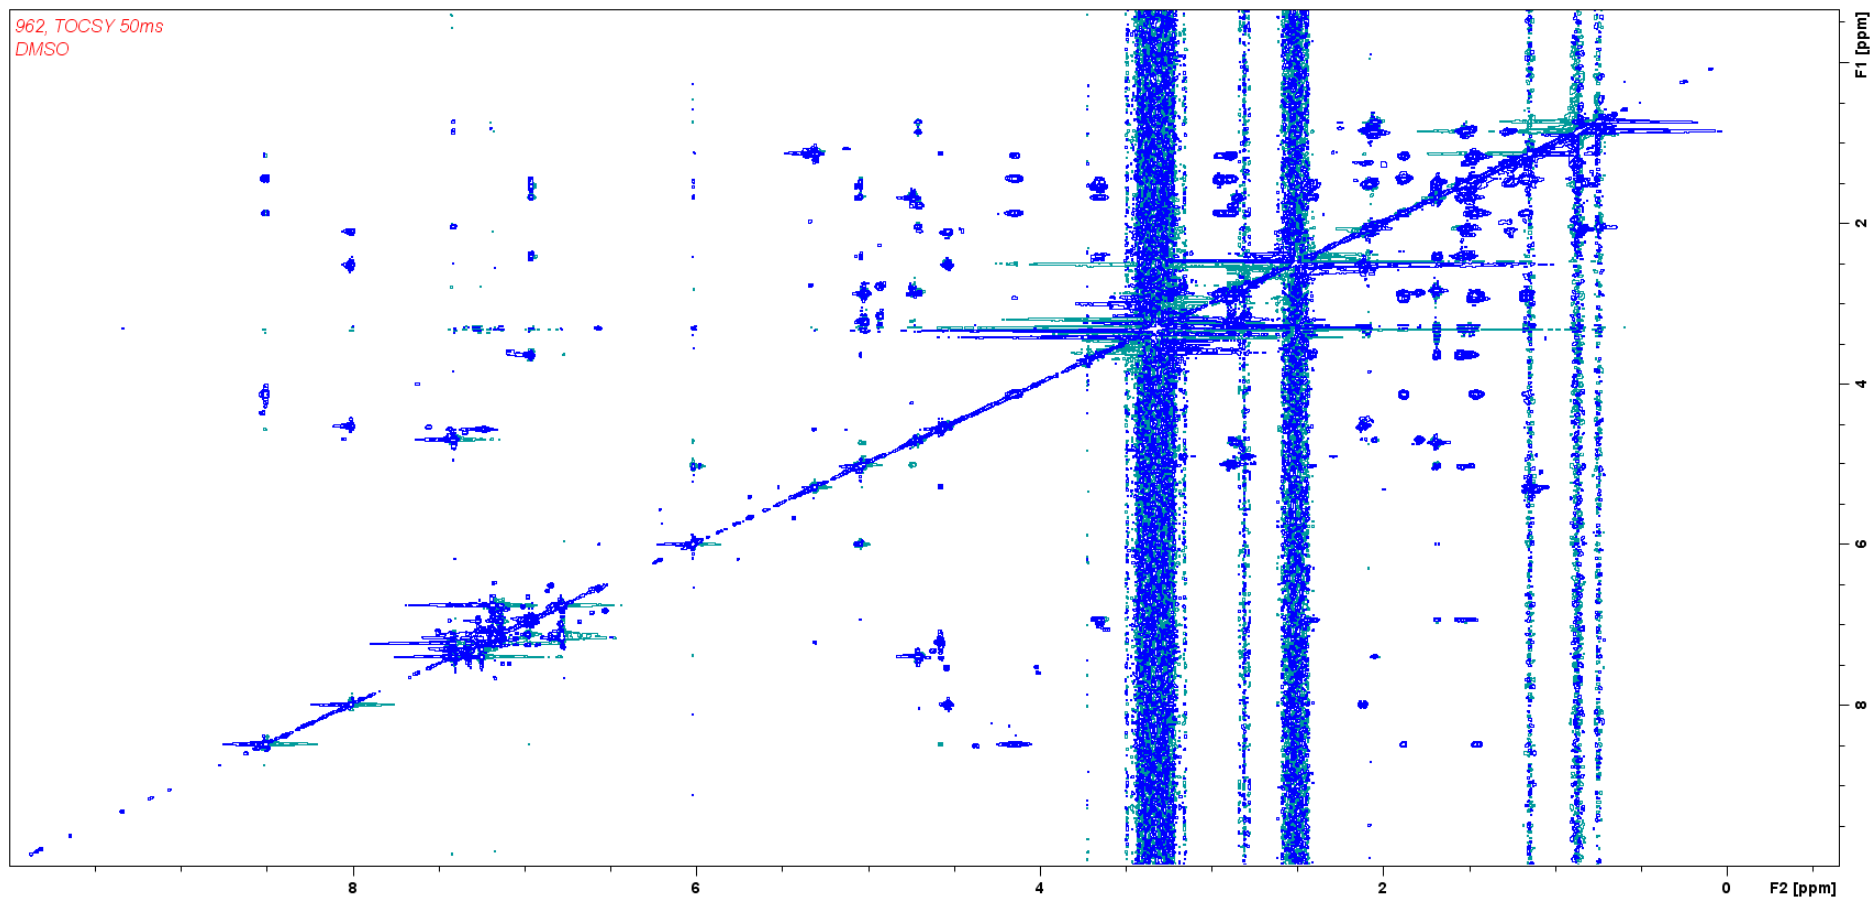

Figure S23a. TOCSY Spectrum of cyanopeptolin CP962 in DMSO-d<sub>6</sub>.

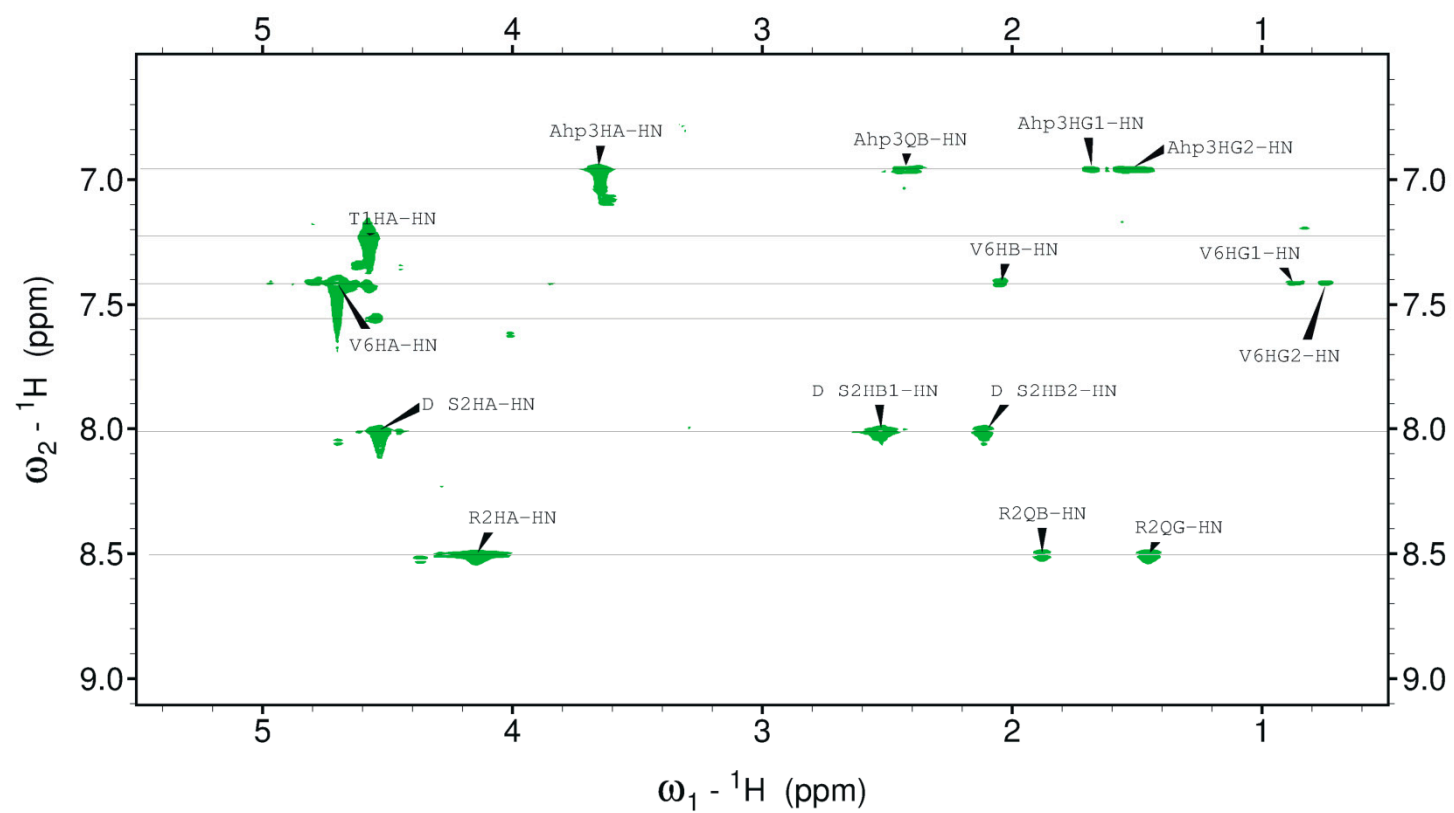

**Figure S23b.** Amino acid spin systems in the diagnostic region of the TOCSY spectrum of cyanopeptolin CP962.

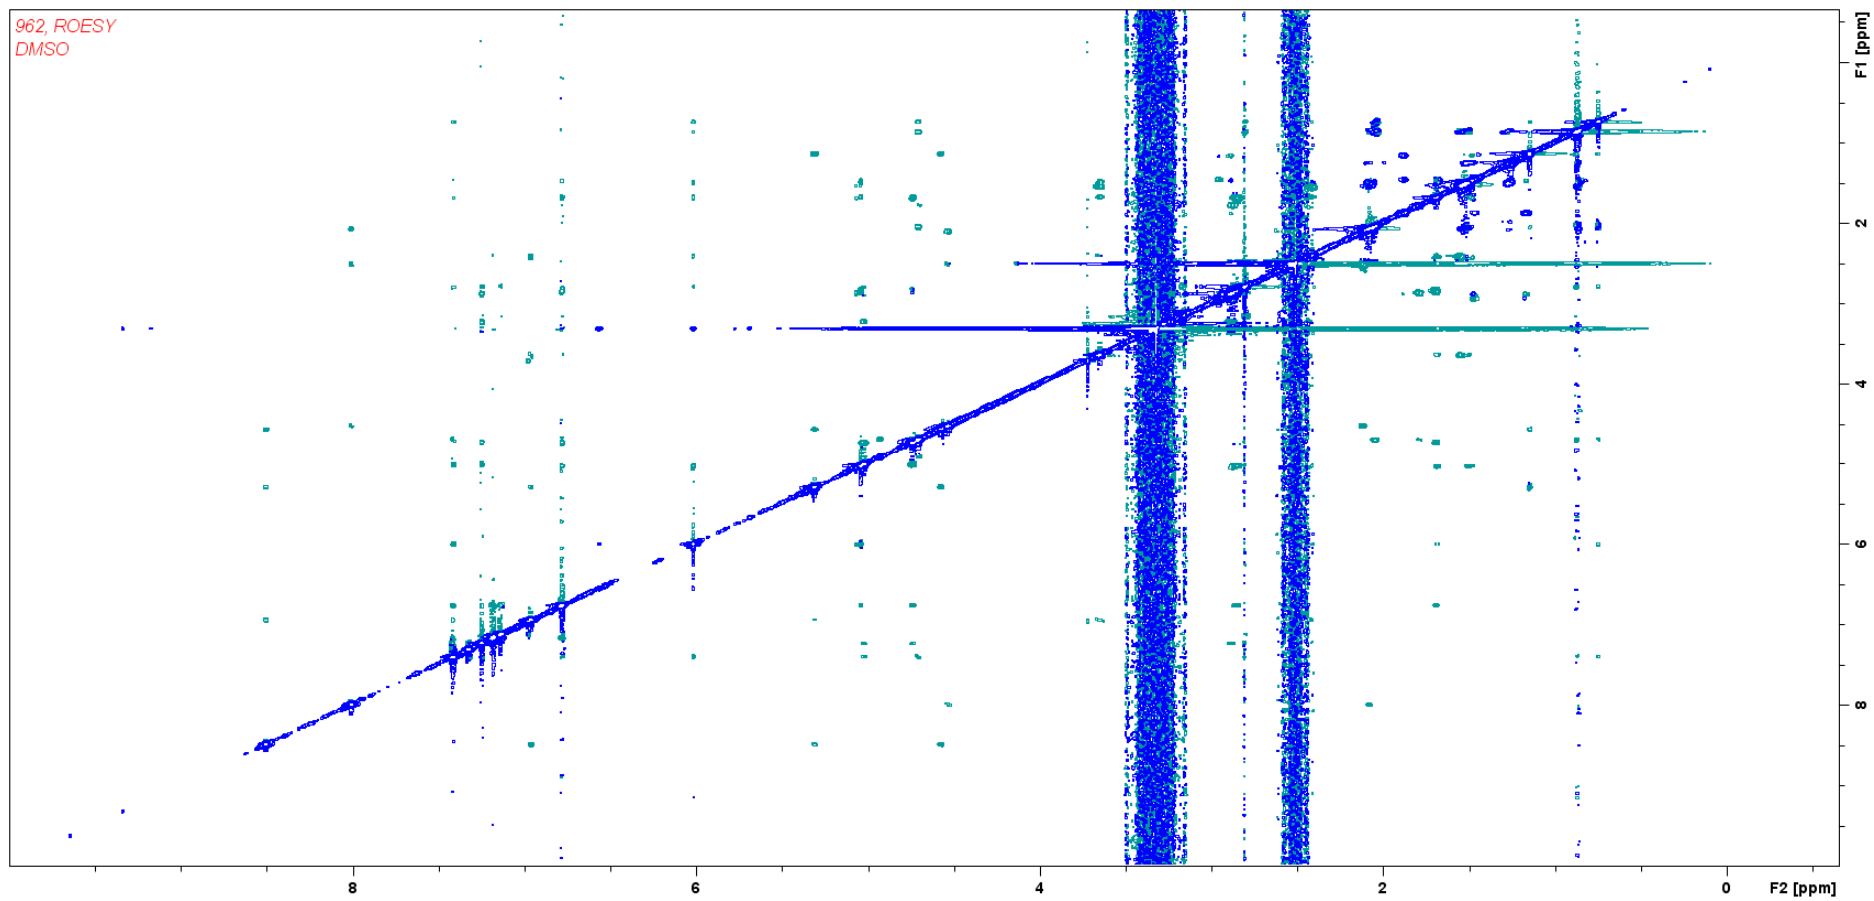

Figure S24a. ROESY Spectrum of cyanopeptolin CP962 in DMSO-d<sub>6</sub>.



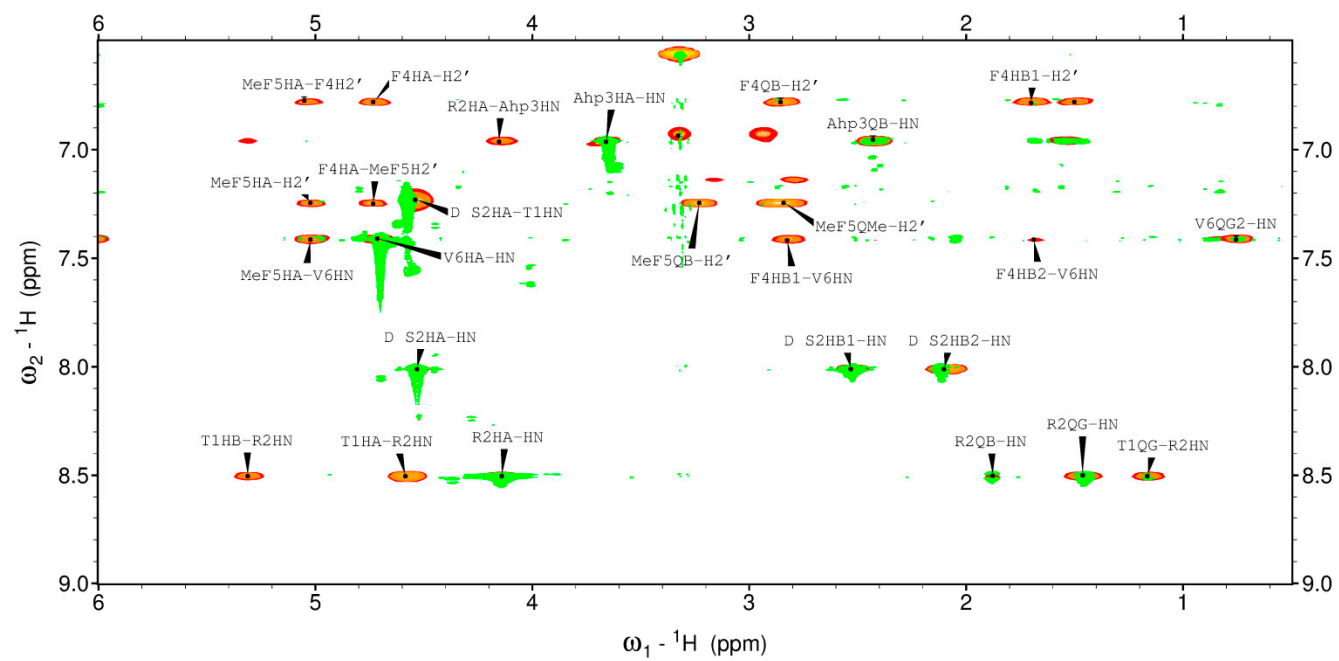

**Figure S24b.** Overlaid fragments of TOCSY (green) and ROESY (red) spectra of cyanopeptolin CP962.
